# Supplementary material for: Congenital feeding response to a novel prey in a Mexican gartersnake
Source: PeerJ. 2020 Mar 5;8:e8718. doi: 10.7717/peerj.8718 (PMC7060902; doi:10.7717/peerj.8718)
Supplement: Data S1 — Neonates of Thamnophis melanogaste r from crayfish-eating population and non-crayfish-eating population [file peerj-08-8718-s003.xlsx]

## Sheet: size neonates
Neonates T. MELANOGASTER
population	litter	snake	sex	weight (g)	SVL (cm)
1	98.5	13		0.87	11
1	98.8	11	2	0.88	11.5		sex 1 = male
1	98.5	6	1	0.9	10.5		sex 2 = female
1	98.5	9	2	0.98	11.5
1	98.5	19	2	1	10		population 1 = NCR non-crayfish-eating
1	98.8	5	2	1	12		population 2 = CR crayfish-eating
1	98.5	21		1.01
1	99.29	3	2	1.01	11
1	98.5	10	1	1.02	10.5
1	98.5	14	2	1.03	11
1	98.5	12	2	1.04	11
1	98.5	15	1	1.05	11.5
1	98.5	7	1	1.06	11.5
1	98.5	8	2	1.06	12
1	98.5	16	2	1.08	11
1	98.5	1	1	1.11	11.5
1	97.3	8	2	1.12	10.7
1	98.5	11	2	1.12	11.5
1	99.29	2	2	1.15	11
1	99.29	6	2	1.16	11
1	97.1	5	2	1.17	12.5
1	98.5	5	1	1.18	12
1	99.29	5	2	1.18	12.5
1	99.13	2	2	1.19	12.3
1	9610	9	2	1.19	14
1	98.8	4	1	1.21	13.5
1	97.1	2	1	1.22	12
1	98.5	2	1	1.22	11.5
1	9610	6	2	1.22	13.3
1	98.5	3	2	1.23	11.5
1	98.8	6	2	1.24	12.5
1	98.5	18	2	1.25	11
1	99.29	4	2	1.26	12
1	97.1	4	1	1.27	13
1	98.4	6		1.28	11
1	98.5	20	1	1.28	11
1	98.8	10	2	1.28	14
1	97.3	1	2	1.3	11
1	9930	2	2	1.32	11
1	97.6	3	2	1.33	12
1	98.8	3	2	1.33	13.5
1	97.9	2	2	1.34	12.5
1	99.23	3	2	1.34	11.6
1	97.1	3	1	1.35	13
1	97.1	6	1	1.35	12.5
1	97.3	7	2	1.36	12.5
1	98.5	17	2	1.36	11.5
1	99.23	1	2	1.37	11.4
1	99.5	7	2	1.39	12.5
1	97.3	2	2	1.4	10.6
1	99.13	7	1	1.4	14
1	99.17	1	1	1.4	13.6
1	99.29	1	2	1.4	13
1	97.11	1	2	1.41	16
1	97.2	1	1	1.41	13
1	97.6	1	1	1.41	13.5
1	98.8	2	1	1.41	14.5
1	98.8	7		1.41	14
1	96.4	5	2	1.42	12.7
1	97.2	6	2	1.42	12.5
1	96.9	3	2	1.43	14.6
1	9610	2	1	1.43	15
1	99.23	6	2	1.44	12.5
1	99.5	1	2	1.44	12.8
1	99.5	8	2	1.44	13.2
1	99.5	3	2	1.45	13
1	97.11	5	2	1.46	16.5
1	98.8	9	2	1.46	14
1	97.2	2	1	1.48	13
1	97.2	4	1	1.48	13.5
1	97.3	5	2	1.48	11.4
1	98.8	8	1	1.48	15
1	99.13	4	1	1.48	13.5
1	99.13	11	1	1.48	14.9
1	96.9	1	1	1.5	14
1	96.9	10	1	1.5	14
1	99.23	2	2	1.5	11.5
1	96.9	7	2	1.51	15
1	97.3	4	2	1.51	11.3
1	97.8	1	2	1.51	13.2
1	96.9	12	1	1.52	15.2
1	97.3	6	2	1.52	11.7
1	99.13	5	2	1.52	13.5
1	99.13	8	1	1.52	14.5
1	9920	2	2	1.53	13
1	97.11	3	1	1.54	16.4
1	98.8	1	2	1.54	14
1	99.23	7	2	1.54	12.7
1	99.5	6	2	1.54	13.4
1	9610	10	2	1.54	14.5
1	97.1	7	1	1.55	13.5
1	97.4	3	2	1.55	14
1	99.5	4	2	1.55	13.2
1	99.5	9	2	1.55	13.5
1	96.9	5	2	1.56	14.9
1	99.5	5	2	1.56	13.8
1	97.3	3	2	1.57	12
1	99.11	10	2	1.57	15.1
1	96.4	7	1	1.58	14
1	96.9	9	1	1.58	15.8
1	96.9	11	2	1.58	15
1	97.1	1	1	1.58	13.5
1	97.9	3	1	1.58	12.4
1	98.5	4	1	1.58	12
1	96.6	12	2	1.59	15.5
1	96.9	4	1	1.59	15
1	97.1	8	2	1.59	13.5
1	97.2	7	1	1.59	13.5
1	97.6	4	1	1.59	13.5
1	96.9	6	2	1.6	15.5
1	98.4	2	1	1.6	13.5
1	97.2	5	1	1.61	13.5
1	97.6	2	2	1.61	13.5
1	96.7	11	1	1.62	15
1	99.11	8	1	1.62	14.9
1	99.19	8	2	1.62	15
1	9610	4	2	1.62	15.2
1	96.4	2	2	1.63	14.5
1	96.9	8	2	1.63	14.1
1	96.9	13	2	1.63	16.6
1	96.4	9	2	1.64	14.5
1	99.13	1	2	1.64	14.41
1	98.4	3	1	1.65	13.5
1	9610	1	2	1.65	14.6
1	96.4	1	1	1.66	14.7
1	97.11	6	2	1.66	17.8
1	99.5	2	2	1.66	13.3
1	96.6	5	1	1.67	15
1	99.11	5	1	1.67	16.5
1	99.9	5	2	1.67	14.8
1	96.4	8	1	1.68	15
1	96.6	16	1	1.68	15
1	96.4	3	2	1.69	14.5
1	97.2	3	2	1.69	13.5
1	96.4	6	2	1.7	14
1	9610	5	1	1.7	15.3
1	96.9	2	1	1.71	15.2
1	98.3	6		1.71
1	98.4	4	2	1.71	14.2
1	99.13	3	1	1.71	15
1	99.13	9	2	1.71	13.8
1	99.32	1	2	1.71	12.5
1	99.9	9	2	1.71	14.5
1	9920	1	2	1.72	14
1	96.4	10	1	1.74	15
1	96.4	11	1	1.74	15
1	99.23	5	2	1.74	12.5
1	99.31	2	1	1.74	13.6
1	96.4	4	1	1.75	14.5
1	99.11	9	1	1.75	15.6
1	96.7	12	1	1.76	16
1	99.11	6	1	1.76	15.4
1	99.9	2	2	1.76	13
1	98.3	4	2	1.77	14
1	99.11	1	2	1.77	15.3
1	99.13	6	2	1.77	15
1	99.31	1	1	1.77	15
1	99.31	3	1	1.77	14
1	98.3	3	2	1.78	14
1	98.3	5	2	1.78	13.5
1	99.11	2	2	1.78	15.6
1	99.19	2	2	1.78	14.5
1	99.19	6	2	1.78	14.6
1	96.6	3	2	1.79	15
1	96.6	13	2	1.79	14.5
1	96.6	14	1	1.79	15.5
1	99.11	7	2	1.79	15.8
1	96.6	8	1	1.8	14.5
1	96.6	11	1	1.8	15.5
1	99.11	4	1	1.8	15.5
1	98.4	1	1	1.81	14.1
1	96.6	2	2	1.82	15
1	97.4	4	2	1.82	13
1	99.9	4	2	1.82	14
1	96.7	8	2	1.83	15.5
1	98.3	1	2	1.83	13.5
1	99.22	1	2	1.83	14.5
1	9610	3	2	1.83	14.8
1	9710	1	1	1.83	14
1	96.6	4	2	1.84	15.5
1	96.6	10	1	1.84	15.7
1	99.11	3	2	1.85	14.3
1	99.31	4	1	1.85	14.5
1	9610	11	2	1.85	15.5
1	96.6	7	2	1.86	15.5
1	96.7	7	2	1.86	15
1	99.14	10	2	1.86	14
1	96.6	9	1	1.88	15
1	96.6	15	1	1.88	15.7
1	97.11	7	2	1.88	17
1	99.19	4	2	1.88	15
1	96.7	2	2	1.89	14.5
1	98.4	5		1.89	12
1	9610	8	2	1.89	15.5
1	99.27	1	2	1.9	15.1
1	9610	7	2	1.9	15
1	96.6	6	2	1.91	15
1	98.3	2	2	1.91	14
1	99.13	10	1	1.91	15
1	99.9	6	1	1.91	15.3
1	99.19	7	2	1.92	15
1	99.31	5	1	1.92	14.6
1	98.6	10		1.93
1	98.6	8	1	1.94	15.8
1	97.11	9	2	1.95	18.2
1	99.9	7	2	1.95	13.6
1	96.7	10	2	1.96	16.5
1	97.4	1	2	1.96
1	99.9	3	2	1.96	14.4
1	99.25	10	2	1.97	14
1	99.9	13	2	1.97	14.1
1	96.6	1	2	1.98	14
1	99.19	1	2	1.98	15.5
1	99.4	6	2	1.98	15
1	99.9	8	2	1.98	14
1	96.7	5	1	1.99	15.5
1	98.6	4	1	1.99	15
1	99.19	9	2	2	14.3
1	99.8	5	2	2.01	14.7
1	99.9	14	2	2.01	15
1	99.9	10	2	2.02	14.4
1	97.11	2	1	2.03	17.2
1	97.11	4	1	2.03	17
1	97.4	6	2	2.03	14.5
1	99.31	6	1	2.03	16
1	96.7	3	2	2.04	16.5
1	98.6	9	1	2.04	15
1	99.14	2	2	2.05	14.5
1	99.19	5	2	2.05	15.4
1	99.9	11	2	2.05	14.6
1	96.5	8	1	2.06	15.7
1	96.7	1	2	2.06	15.3
1	96.7	6	1	2.06	15.5
1	96.6	17	1	2.07	16
1	96.7	9	2	2.07	16
1	99.25	3	2	2.07	14.5
1	99.25	6	2	2.07	14
1	99.4	3	2	2.07	15.6
1	99.9	12	2	2.07	14.7
1	97.11	8	1	2.08	16.8
1	98.6	6	2	2.08	14.2
1	99.14	4	2	2.08	15
1	99.4	4	2	2.09	15.9
1	99.25	9	2	2.11	14.5
1	97.4	2	2	2.12	14
1	99.4	1	2	2.12	16
1	96.5	10	1	2.13	16
1	99.14	7	2	2.14	14.5
1	99.19	3	2	2.14	15.4
1	99.25	1	2	2.14	15
1	99.9	1	2	2.14	14.3
1	99.14	6	2	2.17	14
1	96.7	4	2	2.18	16
1	97.9	1	2	2.18	14.7
1	99.4	2	2	2.18	15.5
1	99.14	1	2	2.19	14
1	99.14	5	2	2.19	14.5
1	99.25	7	2	2.19	15
1	99.8	7	2	2.21	15
1	96.5	4	1	2.24	15.7
1	96.5	5	2	2.24	15
1	99.25	2	2	2.25	15
1	99.27	3	2	2.25	15.2
1	99.4	5	2	2.25	16.3
1	96.5	14	2	2.26	16
1	99.25	4	2	2.26	15
1	96.5	3	2	2.28	15.5
1	99.14	8	2	2.28	14.5
1	96.5	6	2	2.29	16
1	99.27	4	2	2.3	15.2
1	96.5	11	1	2.31	16
1	97.4	5	2	2.31	14
1	97.9	4	1	2.31	15
1	99.14	9	2	2.32	15
1	99.25	8	2	2.32	15
1	99.14	3	2	2.33	15.5
1	99.8	1	2	2.33	15
1	96.5	9	1	2.35	16.5
1	96.5	13	2	2.36	16
1	96.5	1	1	2.38	16
1	96.5	7	2	2.38	16.4
1	99.25	5	2	2.39	15.5
1	99.8	3	2	2.39	15.6
1	98.6	2	1	2.43	15.5
1	99.8	6	2	2.44	15.1
1	96.5	2	2	2.46	17
1	98.6	5	1	2.46	16.2
1	99.8	2	2	2.46	15.6
1	99.8	4	2	2.48	16.2
1	99.27	2	2	2.49	15.5
1	96.5	12	1	2.5	15
1	98.6	1	2	2.53	16
1	98.6	3	2	2.66	16
1	97.11	11		2.69
1	98.6	7	2	2.94	15.7
1	97.12	6		3.34
1	97.12	6		3.34
2	99.7	3	2	1.05	11.6
2	99.7	9	2	1.08	12.7
2	99.12	2	1	1.24	15.5
2	99.7	7	2	1.27	12.3
2	99.7	6	2	1.35	13
2	99.12	5	2	1.4	14.7
2	99.7	4	2	1.43	13.5
2	99.1	3	2	1.51	14.7
2	99.7	2	2	1.55	13.7
2	99.7	5	1	1.55	12.9
2	99.7	8	2	1.55	12.4
2	99.12	6	2	1.59	16.1
2	99.12	4	2	1.61	16
2	99.1	9	2	1.75	15
2	99.1	10	2	1.76	15.4
2	99.1	5	2	1.78	15
2	99.12	3	1	1.79	15.1
2	99.1	6	2	1.81	14.9
2	99.7	1	2	1.83	14.5
2	99.1	1	2	1.92	16
2	99.1	8	2	1.94	15.2
2	99.12	1	2	1.94	17
2	99.1	7	2	1.95	15.5
2	99.1	2	2	1.97	15.5
2	99.1	4	2	1.98	15.8
2	98.1	2	2	2.27	14.7
2	98.1	4	1	2.36	15.2
2	98.1	1	2	2.39	15.4
2	98.1	3	2	2.4	15.5
2	97.7	2	2	3.6	21
2	97.7	3	2	4.76	20.5
2	97.7	1	2	6.26	22.5
2	99.12	7
2	99.12	8
2	99.2	1	2		16
2	99.2	2	2		15
2	99.3	1	2		17
2	99.3	2	2		17
2	99.3	3	2		15.2
2	99.3	4	2		17.5
2	99.7	10
2	99.7	11
2	99.7	12
2	99.7	13
2	99.7	14
2	9906	1	2		15
2	9906	2	2		15
2	9906	3	2		16
2	9906	4	2		17.8

## Sheet: chemo-test
Chemosensory test: Natural logarithm of tongue-flick attack-score (TFAS) of each snake to stimuli of soft new-molted crayfish, hard non-molted crayfish, and distilled water (control)
Population	Litter	snake	odour	tongueflicks	tfas	logtfas
1	97.1	1	1	4	4	0.60206
1	97.1	2	1	1	1	0		odour 1 = water
1	97.1	3	1	5	5	0.69897		odour 2 = soft crayfish
1	97.1	4	1	3	3	0.477121		odour 3 = hard crayfish
1	97.1	7	1	6	6	0.778151
1	97.1	8	1	1	1	0		population 1 = NCR non-crayfish-eating
1	97.11	2	1	10	10	1		population 2 = CR crayfish-eating
1	97.11	3	1	16	16	1.20412
1	97.11	4	1	6	6	0.778151
1	97.11	5	1	13	13	1.11394
1	97.11	6	1	13	13	1.11394
1	97.11	7	1	6	6	0.778151
1	97.11	8	1	1	1	0
1	97.11	9	1	8	8	0.90309
1	97.2	1	1	1	1	0
1	97.2	2	1	2	2	0.30103
1	97.2	3	1	2	2	0.30103
1	97.2	4	1	2	2	0.30103
1	97.2	5	1	2	2	0.30103
1	97.2	7	1	0	0	0
1	97.3	1	1	4	4	0.60206
1	97.3	2	1	11	11	1.04139
1	97.3	3	1	5	5	0.69897
1	97.3	4	1	3	3	0.477121
1	97.3	5	1	5	5	0.69897
1	97.3	6	1	4	4	0.60206
1	97.3	7	1	5	5	0.69897
1	97.4	1	1	6	6	0.778151
1	97.4	2	1	3	3	0.477121
1	97.4	3	1	8	8	0.90309
1	97.4	4	1	11	11	1.04139
1	97.4	5	1	3	3	0.477121
1	97.4	6	1	16	16	1.20412
1	97.6	1	1	2	2	0.30103
1	97.6	2	1	2	2	0.30103
1	97.6	4	1	2	2	0.30103
1	97.8	1	1	1	1	0
1	97.9	1	1	1	1	0
1	97.9	2	1	1	1	0
1	97.9	3	1	1	1	0
1	97.9	4	1	3	3	0.477121
1	98.3	1	1	16	16	1.20412
1	98.3	2	1	2	2	0.30103
1	98.3	3	1	41	41	1.61278
1	98.3	4	1	16	16	1.20412
1	98.3	5	1	16	16	1.20412
1	98.4	1	1	16	16	1.20412
1	98.4	2	1	0	1	0
1	98.4	3	1	12	12	1.07918
1	98.4	4	1	0	1	0
1	98.5	1	1	3	3	0.477121
1	98.5	2	1	10	10	1
1	98.5	3	1	0	1	0
1	98.5	4	1	7	7	0.845098
1	98.5	5	1	11	11	1.04139
1	98.5	6	1	9	9	0.954243
1	98.5	7	1	8	8	0.90309
1	98.5	8	1	3	3	0.477121
1	98.5	9	1	5	5	0.69897
1	98.5	10	1	1	1	0
1	98.5	11	1	10	10	1
1	98.5	12	1	17	17	1.23045
1	98.5	14	1	2	2	0.30103
1	98.5	15	1	2	2	0.30103
1	98.5	16	1	1	1	0
1	98.5	17	1	8	8	0.90309
1	98.5	18	1	8	8	0.90309
1	98.5	19	1	0	1	0
1	98.5	20	1	11	11	1.04139
1	98.6	1	1	10	10	1
1	98.6	2	1	4	4	0.60206
1	98.6	3	1	24	24	1.38021
1	98.6	4	1	14	14	1.14613
1	98.6	5	1	18	18	1.25527
1	98.6	7	1	11	11	1.04139
1	98.6	8	1	15	15	1.17609
1	98.6	9	1	13	13	1.11394
1	98.8	1	1	2	2	0.30103
1	98.8	2	1	6	6	0.778151
1	98.8	3	1	0	1	0
1	98.8	4	1	5	5	0.69897
1	98.8	6	1	0	1	0
1	98.8	8	1	9	9	0.954243
1	9710	1	1	3	3	0.477121
1	9810	1	1	5	5	0.69897
1	9810	2	1	14	14	1.14613
1	9810	3	1	9	9	0.954243
1	9810	4	1	14	14	1.14613
1	9904	1	1	20	20	1.30103
1	9904	2	1	6	6	0.778151
1	9904	3	1	18	18	1.25527
1	9904	4	1	15	15	1.17609
1	9904	5	1	20	20	1.30103
1	9904	6	1	11	11	1.04139
1	9905	1	1	18	18	1.25527
1	9905	2	1	16	16	1.20412
1	9905	3	1	15	15	1.17609
1	9905	4	1	30	30	1.47712
1	9905	5	1	15	15	1.17609
1	9905	6	1	12	12	1.07918
1	9905	7	1	9	9	0.954243
1	9905	8	1	17	17	1.23045
1	9905	9	1	11	11	1.04139
1	9908	1	1	9	9	0.954243
1	9908	2	1	13	13	1.11394
1	9908	3	1	7	7	0.845098
1	9908	4	1	25	25	1.39794
1	9908	5	1	10	10	1
1	9908	6	1	23	23	1.36173
1	9908	7	1	6	6	0.778151
1	9909	1	1	24	24	1.38021
1	9909	2	1	2	2	0.30103
1	9909	3	1	10	10	1
1	9909	4	1	4	4	0.60206
1	9909	5	1	2	2	0.30103
1	9909	6	1	18	18	1.25527
1	9909	7	1	13	13	1.11394
1	9909	8	1	2	2	0.30103
1	9909	9	1	10	10	1
1	9909	10	1	11	11	1.04139
1	9909	11	1	11	11	1.04139
1	9909	12	1	2	2	0.30103
1	9909	13	1	2	2	0.30103
1	9909	14	1	3	3	0.477121
1	9910	1	1	20	20	1.30103
1	9910	2	1	6	6	0.778151
1	9910	3	1	14	14	1.14613
1	9910	4	1	14	14	1.14613
1	9910	5	1	2	2	0.30103
1	9910	6	1	19	19	1.27875
1	9910	7	1	17	17	1.23045
1	9910	8	1	8	8	0.90309
1	9910	9	1	23	23	1.36173
1	9910	10	1	9	9	0.954243
1	9911	1	1	23	23	1.36173
1	9911	2	1	2	2	0.30103
1	9911	3	1	2	2	0.30103
1	9911	4	1	5	5	0.69897
1	9911	5	1	3	3	0.477121
1	9911	6	1	21	21	1.32222
1	9911	7	1	14	14	1.14613
1	9911	8	1	9	9	0.954243
1	9911	9	1	3	3	0.477121
1	9911	10	1	13	13	1.11394
1	9913	3	1	0	1	0
1	9913	4	1	4	4	0.60206
1	9913	5	1	4	4	0.60206
1	9913	6	1	12	12	1.07918
1	9913	9	1	3	3	0.477121
1	9913	10	1	14	14	1.14613
1	9913	11	1	10	10	1
1	9914	1	1	6	6	0.778151
1	9914	2	1	10	10	1
1	9914	3	1	2	2	0.30103
1	9914	4	1	6	6	0.778151
1	9914	5	1	6	6	0.778151
1	9914	6	1	5	5	0.69897
1	9914	7	1	1	1	0
1	9914	9	1	14	14	1.14613
1	9914	10	1	6	6	0.778151
1	9916	1	1	1	1	0
1	9916	2	1	6	6	0.778151
1	9916	3	1	7	7	0.845098
1	9916	4	1	0	1	0
1	9916	6	1	6	6	0.778151
1	9916	8	1	2	2	0.30103
1	9916	9	1	5	5	0.69897
1	9919	1	1	2	2	0.30103
1	9919	2	1	1	1	0
1	9919	4	1	25	25	1.39794
1	9919	5	1	2	2	0.30103
1	9919	6	1	14	14	1.14613
1	9919	7	1	19	19	1.27875
1	9919	8	1	5	5	0.69897
1	9919	9	1	13	13	1.11394
1	9920	1	1	2	2	0.30103
1	9920	2	1	1	1	0
1	9923	5	1	5	5	0.69897
1	9925	1	1	7	7	0.845098
1	9925	2	1	7	7	0.845098
1	9925	3	1	6	6	0.778151
1	9925	4	1	9	9	0.954243
1	9925	5	1	18	18	1.25527
1	9925	6	1	6	6	0.778151
1	9925	7	1	19	19	1.27875
1	9925	8	1	14	14	1.14613
1	9925	9	1	7	7	0.845098
1	9925	10	1	14	14	1.14613
1	9927	2	1	15	15	1.17609
1	9927	3	1	9	9	0.954243
1	9927	4	1	8	8	0.90309
1	97.1	1	2	17	17	1.23045
1	97.1	2	2	1	1	0
1	97.1	3	2	2	54	1.73239
1	97.1	4	2	20	20	1.30103
1	97.1	7	2	1	59	1.77085
1	97.1	8	2	5	5	0.69897
1	97.11	2	2	7	7	0.845098
1	97.11	3	2	28	28	1.44716
1	97.11	4	2	4	4	0.60206
1	97.11	5	2	50	50	1.69897
1	97.11	6	2	40	40	1.60206
1	97.11	7	2	34	34	1.53148
1	97.11	8	2	29	29	1.4624
1	97.11	9	2	32	32	1.50515
1	97.2	1	2	4	58	1.76343
1	97.2	2	2	1	1	0
1	97.2	3	2	3	3	0.477121
1	97.2	4	2	1	1	0
1	97.2	5	2	1	1	0
1	97.2	7	2	0	59	1.77085
1	97.3	1	2	3	3	0.477121
1	97.3	2	2	0	60	1.77815
1	97.3	3	2	4	54	1.73239
1	97.3	4	2	3	55	1.74036
1	97.3	5	2	8	50	1.69897
1	97.3	6	2	10	32	1.50515
1	97.3	7	2	28	28	1.44716
1	97.4	1	2	7	59	1.77085
1	97.4	2	2	32	54	1.73239
1	97.4	3	2	17	17	1.23045
1	97.4	4	2	24	56	1.74819
1	97.4	5	2	3	59	1.77085
1	97.4	6	2	1	59	1.77085
1	97.6	1	2	6	6	0.778151
1	97.6	2	2	2	2	0.30103
1	97.6	4	2	2	2	0.30103
1	97.8	1	2	2	2	0.30103
1	97.9	1	2	4	4	0.60206
1	97.9	2	2	1	1	0
1	97.9	3	2	1	1	0
1	97.9	4	2	2	2	0.30103
1	98.3	1	2	4	4	0.60206
1	98.3	2	2	30	30	1.47712
1	98.3	3	2	30	30	1.47712
1	98.3	4	2	40	40	1.60206
1	98.3	5	2	1	1	0
1	98.4	1	2	22	22	1.34242
1	98.4	2	2	0	0	0
1	98.4	3	2	1	1	0
1	98.4	4	2	11	11	1.04139
1	98.5	1	2	22	22	1.34242
1	98.5	2	2	5	5	0.69897
1	98.5	3	2	11	11	1.04139
1	98.5	4	2	7	7	0.845098
1	98.5	5	2	10	10	1
1	98.5	6	2	10	10	1
1	98.5	7	2	5	5	0.69897
1	98.5	8	2	7	7	0.845098
1	98.5	9	2	5	5	0.69897
1	98.5	10	2	6	6	0.778151
1	98.5	11	2	20	20	1.30103
1	98.5	12	2	19	19	1.27875
1	98.5	14	2	3	3	0.477121
1	98.5	15	2	8	8	0.90309
1	98.5	16	2	3	3	0.477121
1	98.5	17	2	7	7	0.845098
1	98.5	18	2	17	17	1.23045
1	98.5	19	2	4	4	0.60206
1	98.5	20	2	9	9	0.954243
1	98.6	1	2	32	32	1.50515
1	98.6	2	2	3	3	0.477121
1	98.6	3	2	12	12	1.07918
1	98.6	4	2	15	15	1.17609
1	98.6	5	2	18	18	1.25527
1	98.6	7	2	35	35	1.54407
1	98.6	8	2	15	15	1.17609
1	98.6	9	2	4	4	0.60206
1	98.8	1	2	16	16	1.20412
1	98.8	2	2	29	29	1.4624
1	98.8	3	2	5	5	0.69897
1	98.8	4	2	1	1	0
1	98.8	6	2	1	1	0
1	98.8	8	2	2	2	0.30103
1	9710	1	2	3	3	0.477121
1	9810	1	2	2	2	0.30103
1	9810	2	2	2	2	0.30103
1	9810	3	2	21	21	1.32222
1	9810	4	2	35	35	1.54407
1	9904	1	2	3	60	1.77815
1	9904	2	2	13	43	1.63347
1	9904	3	2	18	18	1.25527
1	9904	4	2	3	3	0.477121
1	9904	5	2	5	55	1.74036
1	9904	6	2	16	51	1.70757
1	9905	1	2	16	16	1.20412
1	9905	2	2	30	30	1.47712
1	9905	3	2	4	4	0.60206
1	9905	4	2	26	26	1.41497
1	9905	5	2	29	29	1.4624
1	9905	6	2	16	16	1.20412
1	9905	7	2	15	15	1.17609
1	9905	9	2	16	16	1.20412
1	9905	9	2	9	9	0.954243
1	9908	1	2	17	17	1.23045
1	9908	2	2	8	53	1.72428
1	9908	3	2	15	15	1.17609
1	9908	4	2	6	6	0.778151
1	9908	5	2	17	17	1.23045
1	9908	6	2	26	26	1.41497
1	9908	7	2	4	4	0.60206
1	9909	1	2	15	27	1.43136
1	9909	2	2	1	1	0
1	9909	3	2	8	8	0.90309
1	9909	4	2	3	3	0.477121
1	9909	5	2	12	12	1.07918
1	9909	6	2	18	18	1.25527
1	9909	7	2	18	18	1.25527
1	9909	8	2	9	9	0.954243
1	9909	9	2	15	15	1.17609
1	9909	10	2	5	5	0.69897
1	9909	11	2	11	11	1.04139
1	9909	12	2	6	6	0.778151
1	9909	13	2	19	19	1.27875
1	9909	14	2	10	10	1
1	9910	1	2	3	59	1.77085
1	9910	2	2	9	9	0.954243
1	9910	3	2	26	26	1.41497
1	9910	4	2	12	12	1.07918
1	9910	5	2	11	11	1.04139
1	9910	6	2	11	11	1.04139
1	9910	7	2	15	15	1.17609
1	9910	8	2	10	10	1
1	9910	9	2	15	15	1.17609
1	9910	10	2	20	20	1.30103
1	9911	1	2	27	27	1.43136
1	9911	2	2	10	10	1
1	9911	3	2	2	2	0.30103
1	9911	4	2	6	6	0.778151
1	9911	5	2	7	7	0.845098
1	9911	6	2	5	5	0.69897
1	9911	7	2	10	10	1
1	9911	8	2	18	18	1.25527
1	9911	9	2	5	5	0.69897
1	9911	10	2	2	2	0.30103
1	9913	3	2	13	58	1.76343
1	9913	4	2	2	2	0.30103
1	9913	5	2	7	7	0.845098
1	9913	6	2	4	4	0.60206
1	9913	9	2	1	1	0
1	9913	10	2	17	17	1.23045
1	9913	11	2	21	21	1.32222
1	9914	1	2	28	28	1.44716
1	9914	2	2	10	10	1
1	9914	3	2	12	12	1.07918
1	9914	4	2	31	31	1.49136
1	9914	5	2	2	2	0.30103
1	9914	6	2	7	7	0.845098
1	9914	7	2	7	7	0.845098
1	9914	9	2	15	15	1.17609
1	9914	10	2	3	3	0.477121
1	9916	1	2	1	1	0
1	9916	2	2	4	4	0.60206
1	9916	3	2	5	5	0.69897
1	9916	4	2	2	2	0.30103
1	9916	6	2	7	7	0.845098
1	9916	8	2	8	8	0.90309
1	9916	9	2	2	2	0.30103
1	9919	1	2	1	1	0
1	9919	2	2	15	15	1.17609
1	9919	4	2	16	16	1.20412
1	9919	5	2	24	24	1.38021
1	9919	6	2	15	15	1.17609
1	9919	7	2	15	15	1.17609
1	9919	8	2	19	19	1.27875
1	9919	9	2	12	12	1.07918
1	9920	1	2	19	19	1.27875
1	9920	2	2	1	1	0
1	9923	5	2	3	3	0.477121
1	9925	1	2	13	13	1.11394
1	9925	2	2	14	14	1.14613
1	9925	3	2	17	17	1.23045
1	9925	4	2	4	4	0.60206
1	9925	5	2	7	7	0.845098
1	9925	6	2	22	22	1.34242
1	9925	7	2	16	16	1.20412
1	9925	8	2	17	17	1.23045
1	9925	9	2	22	22	1.34242
1	9925	10	2	10	10	1
1	9927	2	2	15	15	1.17609
1	9927	3	2	17	17	1.23045
1	9927	4	2	21	21	1.32222
1	97.1	1	3	2	2	0.30103
1	97.1	2	3	9	9	0.954243
1	97.1	3	3	2	52	1.716
1	97.1	4	3	1	1	0
1	97.1	7	3	10	10	1
1	97.1	8	3	10	10	1
1	97.11	2	3	6	6	0.778151
1	97.11	3	3	26	26	1.41497
1	97.11	4	3	6	6	0.778151
1	97.11	5	3	38	38	1.57978
1	97.11	6	3	22	22	1.34242
1	97.11	7	3	26	26	1.41497
1	97.11	8	3	24	24	1.38021
1	97.11	9	3	13	13	1.11394
1	97.2	1	3	8	43	1.63347
1	97.2	2	3	2	2	0.30103
1	97.2	3	3	1	1	0
1	97.2	4	3	1	1	0
1	97.2	5	3	5	5	0.69897
1	97.2	7	3	0	60	1.77815
1	97.3	1	3	8	8	0.90309
1	97.3	2	3	2	50	1.69897
1	97.3	3	3	7	7	0.845098
1	97.3	4	3	1	60	1.77815
1	97.3	5	3	3	3	0.477121
1	97.3	6	3	21	21	1.32222
1	97.3	7	3	12	12	1.07918
1	97.4	1	3	53	53	1.72428
1	97.4	2	3	39	45	1.65321
1	97.4	3	3	21	21	1.32222
1	97.4	4	3	2	59	1.77085
1	97.4	5	3	1	60	1.77815
1	97.4	6	3	23	48	1.68124
1	97.6	1	3	1	1	0
1	97.6	2	3	3	3	0.477121
1	97.6	4	3	2	2	0.30103
1	97.8	1	3	1	1	0
1	97.9	1	3	4	4	0.60206
1	97.9	2	3	3	3	0.477121
1	97.9	3	3	1	1	0
1	97.9	4	3	12	12	1.07918
1	98.3	1	3	1	1	0
1	98.3	2	3	11	11	1.04139
1	98.3	3	3	8	8	0.90309
1	98.3	4	3	0	0	0
1	98.3	5	3	3	3	0.477121
1	98.4	1	3	22	22	1.34242
1	98.4	2	3	18	18	1.25527
1	98.4	3	3	17	17	1.23045
1	98.4	4	3	11	11	1.04139
1	98.5	1	3	0	0	0
1	98.5	2	3	4	4	0.60206
1	98.5	3	3	13	13	1.11394
1	98.5	4	3	7	7	0.845098
1	98.5	5	3	6	6	0.778151
1	98.5	6	3	16	16	1.20412
1	98.5	7	3	2	2	0.30103
1	98.5	8	3	2	2	0.30103
1	98.5	9	3	9	9	0.954243
1	98.5	10	3	13	13	1.11394
1	98.5	11	3	7	7	0.845098
1	98.5	12	3	10	10	1
1	98.5	14	3	16	16	1.20412
1	98.5	15	3	9	9	0.954243
1	98.5	16	3	16	16	1.20412
1	98.5	17	3	5	5	0.69897
1	98.5	18	3	12	12	1.07918
1	98.5	19	3	2	2	0.30103
1	98.5	20	3	6	6	0.778151
1	98.6	1	3	2	2	0.30103
1	98.6	2	3	10	10	1
1	98.6	3	3	13	13	1.11394
1	98.6	4	3	12	12	1.07918
1	98.6	5	3	30	30	1.47712
1	98.6	7	3	9	9	0.954243
1	98.6	8	3	14	14	1.14613
1	98.6	9	3	5	5	0.69897
1	98.8	1	3	3	3	0.477121
1	98.8	2	3	0	0	0
1	98.8	3	3	0	0	0
1	98.8	4	3	4	4	0.60206
1	98.8	6	3	6	6	0.778151
1	98.8	8	3	6	6	0.778151
1	9710	1	3	3	3	0.477121
1	9810	1	3	5	5	0.69897
1	9810	2	3	16	16	1.20412
1	9810	3	3	16	16	1.20412
1	9810	4	3	21	21	1.32222
1	9904	1	3	23	23	1.36173
1	9904	2	3	6	6	0.778151
1	9904	3	3	31	31	1.49136
1	9904	4	3	8	8	0.90309
1	9904	5	3	21	21	1.32222
1	9904	6	3	13	13	1.11394
1	9905	1	3	22	22	1.34242
1	9905	2	3	11	11	1.04139
1	9905	3	3	14	14	1.14613
1	9905	4	3	10	10	1
1	9905	5	3	23	23	1.36173
1	9905	6	3	14	14	1.14613
1	9905	7	3	15	15	1.17609
1	9905	8	3	10	10	1
1	9905	8	3	16	16	1.20412
1	9908	1	3	12	12	1.07918
1	9908	2	3	20	20	1.30103
1	9908	3	3	3	3	0.477121
1	9908	4	3	32	32	1.50515
1	9908	5	3	9	9	0.954243
1	9908	6	3	20	20	1.30103
1	9908	7	3	9	9	0.954243
1	9909	1	3	3	3	0.477121
1	9909	2	3	5	5	0.69897
1	9909	3	3	8	8	0.90309
1	9909	4	3	20	20	1.30103
1	9909	5	3	4	4	0.60206
1	9909	6	3	27	27	1.43136
1	9909	7	3	3	3	0.477121
1	9909	8	3	2	2	0.30103
1	9909	9	3	14	14	1.14613
1	9909	10	3	21	21	1.32222
1	9909	11	3	11	11	1.04139
1	9909	12	3	15	15	1.17609
1	9909	13	3	2	2	0.30103
1	9909	14	3	2	2	0.30103
1	9910	1	3	10	10	1
1	9910	2	3	15	15	1.17609
1	9910	3	3	4	4	0.60206
1	9910	4	3	8	8	0.90309
1	9910	5	3	20	20	1.30103
1	9910	6	3	16	16	1.20412
1	9910	7	3	9	9	0.954243
1	9910	8	3	15	15	1.17609
1	9910	9	3	15	15	1.17609
1	9910	10	3	13	13	1.11394
1	9911	1	3	12	12	1.07918
1	9911	2	3	4	4	0.60206
1	9911	3	3	15	15	1.17609
1	9911	4	3	16	16	1.20412
1	9911	5	3	2	2	0.30103
1	9911	6	3	15	15	1.17609
1	9911	7	3	7	7	0.845098
1	9911	8	3	8	8	0.90309
1	9911	9	3	20	20	1.30103
1	9911	10	3	18	18	1.25527
1	9913	3	3	4	54	1.73239
1	9913	4	3	0	0	0
1	9913	5	3	3	3	0.477121
1	9913	6	3	17	17	1.23045
1	9913	9	3	20	20	1.30103
1	9913	10	3	11	11	1.04139
1	9913	11	3	4	4	0.60206
1	9914	1	3	14	14	1.14613
1	9914	2	3	1	1	0
1	9914	3	3	6	6	0.778151
1	9914	4	3	14	14	1.14613
1	9914	5	3	8	8	0.90309
1	9914	6	3	17	17	1.23045
1	9914	7	3	7	7	0.845098
1	9914	9	3	16	16	1.20412
1	9914	10	3	3	3	0.477121
1	9916	1	3	3	3	0.477121
1	9916	2	3	10	10	1
1	9916	3	3	1	1	0
1	9916	4	3	2	2	0.30103
1	9916	6	3	3	3	0.477121
1	9916	8	3	11	11	1.04139
1	9916	9	3	5	5	0.69897
1	9919	1	3	15	15	1.17609
1	9919	2	3	30	30	1.47712
1	9919	4	3	10	10	1
1	9919	5	3	6	6	0.778151
1	9919	6	3	19	19	1.27875
1	9919	7	3	16	16	1.20412
1	9919	8	3	19	19	1.27875
1	9919	9	3	10	10	1
1	9920	1	3	22	22	1.34242
1	9920	2	3	1	1	0
1	9923	5	3	14	14	1.14613
1	9925	1	3	15	15	1.17609
1	9925	2	3	10	10	1
1	9925	3	3	5	5	0.69897
1	9925	4	3	9	9	0.954243
1	9925	5	3	19	19	1.27875
1	9925	6	3	15	15	1.17609
1	9925	7	3	30	30	1.47712
1	9925	8	3	6	6	0.778151
1	9925	9	3	9	9	0.954243
1	9925	10	3	2	2	0.30103
1	9927	2	3	22	22	1.34242
1	9927	3	3	20	20	1.30103
1	9927	4	3	15	15	1.17609
2	97.7	1	1	2	2	0.30103
2	97.7	2	1	1	1	0
2	97.7	3	1	8	8	0.90309
2	98.1	1	1	15	15	1.17609
2	98.1	2	1	10	10	1
2	98.2	1	1	17	17	1.23045
2	9901	1	1	20	20	1.30103
2	9901	2	1	40	40	1.60206
2	9901	3	1	0	1	0
2	9901	4	1	23	23	1.36173
2	9901	5	1	2	2	0.30103
2	9901	6	1	18	18	1.25527
2	9902	1	1	21	21	1.32222
2	9902	2	1	3	3	0.477121
2	9903	1	1	38	38	1.57978
2	9903	2	1	2	2	0.30103
2	9903	3	1	24	24	1.38021
2	9903	4	1	27	27	1.43136
2	9906	1	1	7	7	0.845098
2	9906	2	1	32	32	1.50515
2	9906	3	1	37	37	1.5682
2	9906	4	1	12	12	1.07918
2	9906	5	1	25	25	1.39794
2	9906	6	1	9	9	0.954243
2	9907	1	1	8	8	0.90309
2	9907	2	1	15	15	1.17609
2	9907	4	1	3	3	0.477121
2	9907	5	1	1	1	0
2	9907	8	1	13	13	1.11394
2	9912	1	1	0	1	0
2	9912	3	1	1	1	0
2	9912	4	1	15	15	1.17609
2	97.7	1	2	5	5	0.69897
2	97.7	2	2	15	15	1.17609
2	97.7	3	2	10	10	1
2	98.1	1	2	33	33	1.51851
2	98.1	2	2	26	26	1.41497
2	98.2	1	2	0	0	0
2	9901	1	2	6	6	0.778151
2	9901	2	2	17	17	1.23045
2	9901	3	2	12	12	1.07918
2	9901	4	2	18	18	1.25527
2	9901	5	2	38	38	1.57978
2	9901	6	2	30	30	1.47712
2	9902	1	2	43	43	1.63347
2	9902	2	2	19	19	1.27875
2	9903	1	2	15	15	1.17609
2	9903	2	2	35	35	1.54407
2	9903	3	2	18	18	1.25527
2	9903	4	2	4	57	1.75587
2	9906	1	2	23	23	1.36173
2	9906	2	2	39	39	1.59106
2	9906	3	2	31	31	1.49136
2	9906	4	2	18	18	1.25527
2	9906	5	2	18	18	1.25527
2	9906	6	2	5	5	0.69897
2	9907	1	2	21	21	1.32222
2	9907	2	2	5	5	0.69897
2	9907	4	2	7	7	0.845098
2	9907	5	2	1	1	0
2	9907	8	2	13	13	1.11394
2	9912	1	2	8	8	0.90309
2	9912	3	2	3	3	0.477121
2	9912	4	2	20	20	1.30103
2	97.7	1	3	5	5	0.69897
2	97.7	2	3	4	4	0.60206
2	97.7	3	3	24	24	1.38021
2	98.1	1	3	2	2	0.962537
2	98.1	2	3	13	13	1.11394
2	98.2	1	3	4	4	0.60206
2	9901	1	3	2	2	0.30103
2	9901	2	3	4	4	0.60206
2	9901	3	3	28	28	1.44716
2	9901	4	3	17	17	1.23045
2	9901	5	3	16	16	1.20412
2	9901	6	3	21	21	1.32222
2	9902	1	3	25	25	1.39794
2	9902	2	3	10	10	1
2	9903	1	3	6	6	0.778151
2	9903	2	3	1	1	0
2	9903	3	3	27	27	1.43136
2	9903	4	3	16	16	1.20412
2	9906	1	3	27	27	1.43136
2	9906	2	3	26	26	1.41497
2	9906	3	3	30	30	1.47712
2	9906	4	3	15	15	1.17609
2	9906	5	3	13	13	1.11394
2	9906	6	3	10	10	1
2	9907	1	3	10	10	1
2	9907	2	3	8	8	0.90309
2	9907	4	3	10	10	1
2	9907	5	3	1	1	0
2	9907	8	3	4	4	0.60206
2	9912	1	3	1	1	0
2	9912	3	3	4	4	0.60206
2	9912	4	3	10	10	1

## Sheet: crayfish ingestion
Ingestion test: Ingestion frequency of crayfish (soft and hard) during the five days of presentation
population	number	litter	snake	day presentation	crayfish	ingestion frequency
1	1	96.9	1	1	2	0
1	3	96.9	2	1	2	0
1	5	96.9	3	1	2	0		population 1 = NCR non-crayfish-eating
1	7	96.9	4	1	2	0		population 2 = CR crayfish-eating
1	9	96.9	5	1	2	0
1	15	96.9	8	1	2	0
1	17	96.9	9	1	2	1		crayfish 2 = soft crayfish
1	19	96.9	10	1	2	0		crayfish 3 = hard crayfish
1	28	96.4	1	1	2	0
1	30	96.4	2	1	2	0
1	32	96.4	3	1	2	0
1	34	96.4	4	1	2	0
1	36	96.4	5	1	2	0
1	38	96.4	6	1	2	0
1	40	96.4	7	1	2	0
1	42	96.4	8	1	2	0
1	44	96.4	9	1	2	0
1	46	96.4	10	1	2	0
1	48	96.4	11	1	2	0
1	52	96.5	1	1	2	0
1	54	96.5	2	1	2	0
1	56	96.5	3	1	2	0
1	58	96.5	4	1	2	0
1	60	96.5	5	1	2	0
1	62	96.5	6	1	2	0
1	64	96.5	7	1	2	0
1	66	96.5	8	1	2	0
1	68	96.5	9	1	2	0
1	70	96.5	10	1	2	0
1	72	96.5	11	1	2	0
1	74	96.5	12	1	2	0
1	76	96.5	13	1	2	0
1	78	96.5	14	1	2	0
1	82	96.6	1	1	2	0
1	84	96.6	2	1	2	1
1	86	96.6	3	1	2	0
1	88	96.6	4	1	2	0
1	90	96.6	5	1	2	0
1	92	96.6	6	1	2	1
1	94	96.6	7	1	2	0
1	96	96.6	8	1	2	0
1	98	96.6	9	1	2	1
1	100	96.6	10	1	2	1
1	102	96.6	11	1	2	0
1	104	96.6	12	1	2	1
1	106	96.6	13	1	2	0
1	110	96.6	15	1	2	0
1	114	96.7	1	1	2	1
1	118	96.7	3	1	2	0
1	120	96.7	4	1	2	1
1	122	96.7	5	1	2	1
1	124	96.7	6	1	2	0
1	134	96.7	11	1	2	0
1	139	9610	1	1	2	0
1	141	9610	2	1	2	0
1	143	9610	3	1	2	0
1	145	9610	4	1	2	0
1	147	9610	5	1	2	0
1	149	9610	6	1	2	0
1	151	9610	7	1	2	0
1	153	9610	8	1	2	0
1	155	9610	9	1	2	0
1	157	9610	10	1	2	0
1	159	9610	11	1	2	0
1	235	97.1	1	1	2	0
1	238	97.1	2	1	2	0
1	239	97.1	3	1	2	0
1	242	97.1	4	1	2	0
1	243	97.1	7	1	2	0
1	246	97.1	8	1	2	0
1	247	97.2	1	1	2	0
1	250	97.2	2	1	2	0
1	251	97.2	3	1	2	0
1	254	97.2	4	1	2	1
1	255	97.2	5	1	2	1
1	258	97.2	7	1	2	1
1	260	97.3	1	1	2	0
1	261	97.3	2	1	2	1
1	264	97.3	3	1	2	1
1	265	97.3	4	1	2	0
1	268	97.3	5	1	2	0
1	269	97.3	6	1	2	1
1	272	97.3	7	1	2	0
1	273	97.4	1	1	2	0
1	276	97.4	2	1	2	1
1	277	97.4	3	1	2	0
1	280	97.4	4	1	2	1
1	281	97.4	5	1	2	0
1	284	97.4	6	1	2	0
1	285	97.6	1	1	2	1
1	288	97.6	2	1	2	0
1	289	97.6	4	1	2	1
1	297	97.8	1	1	2	0
1	299	97.9	1	1	2	0
1	302	97.9	2	1	2	0
1	303	97.9	3	1	2	0
1	306	97.9	4	1	2	0
1	307	97.1	1	1	2	0
1	309	97.11	2	1	2	0
1	312	97.11	3	1	2	0
1	313	97.11	4	1	2	1
1	316	97.11	5	1	2	0
1	317	97.11	6	1	2	0
1	320	97.11	7	1	2	0
1	321	97.11	8	1	2	0
1	324	97.11		1	2	0
1	327	98.3	1	1	2	0
1	330	98.3	2	1	2	0
1	331	98.3	3	1	2	0
1	334	98.3	4	1	2	0
1	335	98.3	5	1	2	0
1	337	98.4	1	1	2	0
1	340	98.4	2	1	2	0
1	341	98.4	3	1	2	0
1	344	98.4	4	1	2	0
1	345	98.5	1	1	2	0
1	348	98.5	2	1	2	0
1	349	98.5	3	1	2	0
1	352	98.5	4	1	2	1
1	353	98.5	5	1	2	0
1	356	98.5	6	1	2	0
1	357	98.5	7	1	2	0
1	360	98.5	8	1	2	0
1	361	98.5	9	1	2	1
1	364	98.5	10	1	2	0
1	365	98.5	11	1	2	0
1	368	98.5	12	1	2	0
1	369	98.5	14	1	2	0
1	372	98.5	15	1	2	0
1	373	98.5	16	1	2	0
1	376	98.5	17	1	2	0
1	377	98.5	18	1	2	0
1	380	98.5	19	1	2	0
1	381	98.5	20	1	2	0
1	383	98.6	1	1	2	0
1	386	98.6	2	1	2	0
1	387	98.6	3	1	2	0
1	390	98.6	4	1	2	0
1	391	98.6	5	1	2	0
1	394	98.6	7	1	2	0
1	395	98.6	8	1	2	0
1	398	98.6	9	1	2	0
1	399	98.8	1	1	2	1
1	402	98.8	2	1	2	1
1	403	98.8	3	1	2	0
1	406	98.8	4	1	2	0
1	407	98.8	6	1	2	0
1	410	98.8	8	1	2	1
1	411	98.8	10	1	2	1
1	413	9810	1	1	2	0
1	416	9810	2	1	2	0
1	417	9810	3	1	2	0
1	420	9810	4	1	2	0
1	445	9904	1	1	2	0
1	448	9904	2	1	2	1
1	449	9904	3	1	2	0
1	452	9904	4	1	2	1
1	453	9904	5	1	2	0
1	456	9904	6	1	2	1
1	457	9905	1	1	2	0
1	460	9905	2	1	2	0
1	461	9905	3	1	2	0
1	464	9905	4	1	2	0
1	465	9905	5	1	2	0
1	468	9905	6	1	2	0
1	469	9905	7	1	2	0
1	472	9905	8	1	2	0
1	473	9905	9	1	2	0
1	497	9908	1	1	2	0
1	500	9908	2	1	2	0
1	501	9908	3	1	2	0
1	504	9908	4	1	2	0
1	505	9908	5	1	2	0
1	508	9908	6	1	2	0
1	509	9908	7	1	2	0
1	511	9909	1	1	2	0
1	514	9909	2	1	2	0
1	515	9909	3	1	2	0
1	518	9909	4	1	2	0
1	519	9909	5	1	2	0
1	522	9909	6	1	2	0
1	523	9909	7	1	2	0
1	526	9909	8	1	2	0
1	527	9909	9	1	2	1
1	530	9909	10	1	2	0
1	531	9909	11	1	2	0
1	534	9909	12	1	2	0
1	535	9909	13	1	2	0
1	538	9909	14	1	2	0
1	539	9910	1	1	2	0
1	542	9910	2	1	2	0
1	543	9910	3	1	2	0
1	546	9910	4	1	2	0
1	547	9910	5	1	2	0
1	550	9910	6	1	2	0
1	551	9910	7	1	2	0
1	554	9910	8	1	2	0
1	555	9910	9	1	2	0
1	558	9910	10	1	2	0
1	559	9911	1	1	2	0
1	562	9911	2	1	2	0
1	563	9911	4	1	2	0
1	566	9911	5	1	2	0
1	567	9911	6	1	2	0
1	570	9911	7	1	2	0
1	571	9911	8	1	2	0
1	574	9911	9	1	2	0
1	575	9911	10	1	2	0
1	583	9913	2	1	2	0
1	586	9913	4	1	2	0
1	587	9913	5	1	2	0
1	590	9913	6	1	2	0
1	591	9913	9	1	2	0
1	594	9913	10	1	2	0
1	595	9913	11	1	2	0
1	597	9914	1	1	2	0
1	600	9914	2	1	2	0
1	601	9914	3	1	2	0
1	604	9914	4	1	2	1
1	605	9914	5	1	2	0
1	608	9914	6	1	2	0
1	609	9914	7	1	2	0
1	612	9914	9	1	2	1
1	613	9914	10	1	2	1
1	615	9916	1	1	2	0
1	618	9916	2	1	2	0
1	619	9916	3	1	2	0
1	622	9916	6	1	2	0
1	623	9916	8	1	2	0
1	626	9916	9	1	2	0
1	627	9919	1	1	2	0
1	630	9919	2	1	2	0
1	631	9919	4	1	2	0
1	634	9919	5	1	2	0
1	635	9919	6	1	2	0
1	638	9919	7	1	2	0
1	639	9919	8	1	2	0
1	642	9919	9	1	2	1
1	643	9920	1	1	2	0
1	646	9920	2	1	2	0
1	647	9923	5	1	2	0
1	649	9925	1	1	2	0
1	652	9925	2	1	2	0
1	653	9925	3	1	2	0
1	656	9925	4	1	2	0
1	657	9925	5	1	2	0
1	660	9925	6	1	2	0
1	661	9925	7	1	2	0
1	664	9925	8	1	2	0
1	665	9925	9	1	2	0
1	668	9925	10	1	2	0
1	669	9927	2	1	2	0
1	672	9927	3	1	2	0
1	2	96.9	1	1	3	0
1	4	96.9	2	1	3	0
1	6	96.9	3	1	3	0
1	8	96.9	4	1	3	1
1	10	96.9	5	1	3	0
1	16	96.9	8	1	3	0
1	18	96.9	9	1	3	0
1	20	96.9	10	1	3	0
1	29	96.4	1	1	3	0
1	31	96.4	2	1	3	0
1	33	96.4	3	1	3	0
1	35	96.4	4	1	3	0
1	37	96.4	5	1	3	0
1	39	96.4	6	1	3	0
1	41	96.4	7	1	3	0
1	43	96.4	8	1	3	0
1	45	96.4	9	1	3	0
1	47	96.4	10	1	3	0
1	49	96.4	11	1	3	0
1	53	96.5	1	1	3	0
1	55	96.5	2	1	3	0
1	57	96.5	3	1	3	0
1	59	96.5	4	1	3	0
1	61	96.5	5	1	3	0
1	63	96.5	6	1	3	0
1	65	96.5	7	1	3	0
1	67	96.5	8	1	3	0
1	69	96.5	9	1	3	0
1	71	96.5	10	1	3	0
1	73	96.5	11	1	3	0
1	75	96.5	12	1	3	1
1	77	96.5	13	1	3	0
1	79	96.5	14	1	3	0
1	83	96.6	1	1	3	0
1	85	96.6	2	1	3	0
1	87	96.6	3	1	3	1
1	89	96.6	4	1	3	0
1	91	96.6	5	1	3	0
1	93	96.6	6	1	3	0
1	95	96.6	7	1	3	0
1	97	96.6	8	1	3	1
1	99	96.6	9	1	3	0
1	101	96.6	10	1	3	0
1	103	96.6	11	1	3	0
1	105	96.6	12	1	3	1
1	107	96.6	13	1	3	0
1	111	96.6	15	1	3	0
1	115	96.7	1	1	3	0
1	119	96.7	3	1	3	0
1	121	96.7	4	1	3	0
1	123	96.7	5	1	3	0
1	125	96.7	6	1	3	0
1	135	96.7	11	1	3	1
1	140	9610	1	1	3	0
1	142	9610	2	1	3	0
1	144	9610	3	1	3	0
1	146	9610	4	1	3	0
1	148	9610	5	1	3	0
1	150	9610	6	1	3	0
1	152	9610	7	1	3	0
1	154	9610	8	1	3	0
1	156	9610	9	1	3	0
1	158	9610	10	1	3	0
1	160	9610	11	1	3	0
1	236	97.1	1	1	3	0
1	237	97.1	2	1	3	0
1	240	97.1	3	1	3	0
1	241	97.1	4	1	3	1
1	244	97.1	7	1	3	0
1	245	97.1	8	1	3	0
1	248	97.2	1	1	3	0
1	249	97.2	2	1	3	0
1	252	97.2	3	1	3	0
1	253	97.2	4	1	3	0
1	256	97.2	5	1	3	0
1	257	97.2	7	1	3	0
1	259	97.3	1	1	3	0
1	262	97.3	2	1	3	1
1	263	97.3	3	1	3	0
1	266	97.3	4	1	3	1
1	267	97.3	5	1	3	1
1	270	97.3	6	1	3	0
1	271	97.3	7	1	3	0
1	274	97.4	1	1	3	1
1	275	97.4	2	1	3	0
1	278	97.4	3	1	3	0
1	279	97.4	4	1	3	0
1	282	97.4	5	1	3	0
1	283	97.4	6	1	3	1
1	286	97.6	1	1	3	0
1	287	97.6	2	1	3	0
1	290	97.6	4	1	3	1
1	298	97.8	1	1	3	0
1	300	97.9	1	1	3	0
1	301	97.9	2	1	3	0
1	304	97.9	3	1	3	0
1	305	97.9	4	1	3	0
1	308	97.1	1	1	3	0
1	310	97.11	2	1	3	0
1	311	97.11	3	1	3	0
1	314	97.11	4	1	3	0
1	315	97.11	5	1	3	0
1	318	97.11	6	1	3	0
1	319	97.11	7	1	3	0
1	322	97.11		1	3	0
1	323	97.11	9	1	3	0
1	328	98.3	1	1	3	0
1	329	98.3	2	1	3	1
1	332	98.3	3	1	3	0
1	333	98.3	4	1	3	0
1	336	98.3	5	1	3	0
1	338	98.4	1	1	3	0
1	339	98.4	2	1	3	0
1	342	98.4	3	1	3	0
1	343	98.4	4	1	3	0
1	346	98.5	1	1	3	0
1	347	98.5	2	1	3	0
1	350	98.5	3	1	3	0
1	351	98.5	4	1	3	0
1	354	98.5	5	1	3	0
1	355	98.5	6	1	3	1
1	358	98.5	7	1	3	0
1	359	98.5	8	1	3	0
1	362	98.5	9	1	3	0
1	363	98.5	10	1	3	0
1	366	98.5	11	1	3	0
1	367	98.5	12	1	3	0
1	370	98.5	14	1	3	1
1	371	98.5	15	1	3	0
1	374	98.5	16	1	3	0
1	375	98.5	17	1	3	0
1	378	98.5	18	1	3	0
1	379	98.5	19	1	3	0
1	382	98.5	20	1	3	0
1	384	98.6	1	1	3	0
1	385	98.6	2	1	3	0
1	388	98.6	3	1	3	0
1	389	98.6	4	1	3	0
1	392	98.6	5	1	3	0
1	393	98.6	7	1	3	0
1	396	98.6	8	1	3	0
1	397	98.6	9	1	3	0
1	400	98.8	1	1	3	0
1	401	98.8	2	1	3	0
1	404	98.8	3	1	3	1
1	405	98.8	4	1	3	1
1	408	98.8	6	1	3	0
1	409	98.8	8	1	3	0
1	412	98.8	10	1	3	0
1	414	9810	1	1	3	0
1	415	9810	2	1	3	0
1	418	9810	3	1	3	0
1	419	9810	4	1	3	0
1	446	9904	1	1	3	0
1	447	9904	2	1	3	0
1	450	9904	3	1	3	0
1	451	9904	4	1	3	0
1	454	9904	5	1	3	1
1	455	9904	6	1	3	1
1	458	9905	1	1	3	0
1	459	9905	2	1	3	0
1	462	9905	3	1	3	0
1	463	9905	4	1	3	0
1	466	9905	5	1	3	0
1	467	9905	6	1	3	0
1	470	9905	7	1	3	0
1	471	9905	8	1	3	0
1	474	9905	9	1	3	0
1	498	9908	1	1	3	0
1	499	9908	2	1	3	0
1	502	9908	3	1	3	0
1	503	9908	4	1	3	0
1	506	9908	5	1	3	0
1	507	9908	6	1	3	0
1	510	9908	7	1	3	0
1	512	9909	1	1	3	0
1	513	9909	2	1	3	0
1	516	9909	3	1	3	0
1	517	9909	4	1	3	0
1	520	9909	5	1	3	0
1	521	9909	6	1	3	0
1	524	9909	7	1	3	0
1	525	9909	8	1	3	0
1	528	9909	9	1	3	0
1	529	9909	10	1	3	0
1	532	9909	11	1	3	0
1	533	9909	12	1	3	0
1	536	9909	13	1	3	0
1	537	9909	14	1	3	0
1	540	9910	1	1	3	0
1	541	9910	2	1	3	0
1	544	9910	3	1	3	0
1	545	9910	4	1	3	0
1	548	9910	5	1	3	0
1	549	9910	6	1	3	0
1	552	9910	7	1	3	0
1	553	9910	8	1	3	0
1	556	9910	9	1	3	0
1	557	9910	10	1	3	0
1	560	9911	1	1	3	0
1	561	9911	2	1	3	0
1	564	9911	4	1	3	0
1	565	9911	5	1	3	0
1	568	9911	6	1	3	0
1	569	9911	7	1	3	0
1	572	9911	8	1	3	1
1	573	9911	9	1	3	0
1	576	9911	10	1	3	0
1	584	9913	2	1	3	0
1	585	9913	4	1	3	0
1	588	9913	5	1	3	0
1	589	9913	6	1	3	0
1	592	9913	9	1	3	1
1	593	9913	10	1	3	0
1	596	9913	11	1	3	0
1	598	9914	1	1	3	0
1	599	9914	2	1	3	0
1	602	9914	3	1	3	1
1	603	9914	4	1	3	0
1	606	9914	5	1	3	0
1	607	9914	6	1	3	0
1	610	9914	7	1	3	0
1	611	9914	9	1	3	1
1	614	9914	10	1	3	1
1	616	9916	1	1	3	0
1	617	9916	2	1	3	0
1	620	9916	3	1	3	0
1	621	9916	6	1	3	0
1	624	9916	8	1	3	0
1	625	9916	9	1	3	0
1	628	9919	1	1	3	1
1	629	9919	2	1	3	0
1	632	9919	4	1	3	0
1	633	9919	5	1	3	0
1	636	9919	6	1	3	0
1	637	9919	7	1	3	0
1	640	9919	8	1	3	0
1	641	9919	9	1	3	1
1	644	9920	1	1	3	0
1	645	9920	2	1	3	0
1	648	9923	5	1	3	0
1	650	9925	1	1	3	0
1	651	9925	2	1	3	0
1	654	9925	3	1	3	0
1	655	9925	4	1	3	0
1	658	9925	5	1	3	0
1	659	9925	6	1	3	0
1	662	9925	7	1	3	0
1	663	9925	8	1	3	0
1	666	9925	9	1	3	0
1	667	9925	10	1	3	0
1	670	9927	2	1	3	0
1	671	9927	3	1	3	0
1	1	96.9	1	2	2	0
1	3	96.9	2	2	2	1
1	5	96.9	3	2	2	0
1	7	96.9	4	2	2	0
1	9	96.9	5	2	2	0
1	15	96.9	8	2	2	0
1	17	96.9	9	2	2	1
1	19	96.9	10	2	2	0
1	28	96.4	1	2	2	0
1	30	96.4	2	2	2	0
1	32	96.4	3	2	2	0
1	34	96.4	4	2	2	0
1	36	96.4	5	2	2	0
1	38	96.4	6	2	2	0
1	40	96.4	7	2	2	1
1	42	96.4	8	2	2	0
1	44	96.4	9	2	2	0
1	46	96.4	10	2	2	0
1	48	96.4	11	2	2	0
1	52	96.5	1	2	2	0
1	54	96.5	2	2	2	0
1	56	96.5	3	2	2	0
1	58	96.5	4	2	2	1
1	60	96.5	5	2	2	0
1	62	96.5	6	2	2	0
1	64	96.5	7	2	2	0
1	66	96.5	8	2	2	0
1	68	96.5	9	2	2	0
1	70	96.5	10	2	2	0
1	72	96.5	11	2	2	1
1	74	96.5	12	2	2	0
1	76	96.5	13	2	2	0
1	78	96.5	14	2	2	0
1	82	96.6	1	2	2	0
1	84	96.6	2	2	2	1
1	86	96.6	3	2	2	0
1	88	96.6	4	2	2	0
1	90	96.6	5	2	2	0
1	92	96.6	6	2	2	0
1	94	96.6	7	2	2	1
1	96	96.6	8	2	2	0
1	98	96.6	9	2	2	1
1	100	96.6	10	2	2	0
1	102	96.6	11	2	2	1
1	104	96.6	12	2	2	0
1	106	96.6	13	2	2	0
1	110	96.6	15	2	2	0
1	114	96.7	1	2	2	1
1	118	96.7	3	2	2	0
1	120	96.7	4	2	2	1
1	122	96.7	5	2	2	0
1	124	96.7	6	2	2	0
1	134	96.7	11	2	2	1
1	139	9610	1	2	2	0
1	141	9610	2	2	2	0
1	143	9610	3	2	2	0
1	145	9610	4	2	2	0
1	147	9610	5	2	2	0
1	149	9610	6	2	2	0
1	151	9610	7	2	2	0
1	153	9610	8	2	2	0
1	155	9610	9	2	2	0
1	157	9610	10	2	2	0
1	159	9610	11	2	2	0
1	235	97.1	1	2	2	0
1	238	97.1	2	2	2	0
1	239	97.1	3	2	2	0
1	242	97.1	4	2	2	0
1	243	97.1	7	2	2	0
1	246	97.1	8	2	2	0
1	247	97.2	1	2	2	1
1	250	97.2	2	2	2	0
1	251	97.2	3	2	2	0
1	254	97.2	4	2	2	1
1	255	97.2	5	2	2	0
1	258	97.2	7	2	2	0
1	260	97.3	1	2	2	0
1	261	97.3	2	2	2	0
1	264	97.3	3	2	2	0
1	265	97.3	4	2	2	0
1	268	97.3	5	2	2	0
1	269	97.3	6	2	2	1
1	272	97.3	7	2	2	0
1	273	97.4	1	2	2	0
1	276	97.4	2	2	2	1
1	277	97.4	3	2	2	1
1	280	97.4	4	2	2	1
1	281	97.4	5	2	2	1
1	284	97.4	6	2	2	1
1	285	97.6	1	2	2	0
1	288	97.6	2	2	2	0
1	289	97.6	4	2	2	1
1	297	97.8	1	2	2	0
1	299	97.9	1	2	2	0
1	302	97.9	2	2	2	0
1	303	97.9	3	2	2	0
1	306	97.9	4	2	2	0
1	307	97.1	1	2	2	0
1	309	97.11	2	2	2	0
1	312	97.11	3	2	2	1
1	313	97.11	4	2	2	1
1	316	97.11	5	2	2	0
1	317	97.11	6	2	2	0
1	320	97.11	7	2	2	0
1	321	97.11	8	2	2	0
1	324	97.11		2	2	0
1	327	98.3	1	2	2	0
1	330	98.3	2	2	2	0
1	331	98.3	3	2	2	0
1	334	98.3	4	2	2	0
1	335	98.3	5	2	2	0
1	337	98.4	1	2	2	0
1	340	98.4	2	2	2	0
1	341	98.4	3	2	2	0
1	344	98.4	4	2	2	0
1	345	98.5	1	2	2	0
1	348	98.5	2	2	2	0
1	349	98.5	3	2	2	0
1	352	98.5	4	2	2	0
1	353	98.5	5	2	2	0
1	356	98.5	6	2	2	0
1	357	98.5	7	2	2	0
1	360	98.5	8	2	2	0
1	361	98.5	9	2	2	0
1	364	98.5	10	2	2	0
1	365	98.5	11	2	2	0
1	368	98.5	12	2	2	0
1	369	98.5	14	2	2	0
1	372	98.5	15	2	2	0
1	373	98.5	16	2	2	0
1	376	98.5	17	2	2	0
1	377	98.5	18	2	2	0
1	380	98.5	19	2	2	0
1	381	98.5	20	2	2	0
1	383	98.6	1	2	2	0
1	386	98.6	2	2	2	0
1	387	98.6	3	2	2	1
1	390	98.6	4	2	2	0
1	391	98.6	5	2	2	1
1	394	98.6	7	2	2	0
1	395	98.6	8	2	2	0
1	398	98.6	9	2	2	1
1	399	98.8	1	2	2	1
1	402	98.8	2	2	2	1
1	403	98.8	3	2	2	0
1	406	98.8	4	2	2	0
1	407	98.8	6	2	2	0
1	410	98.8	8	2	2	0
1	411	98.8	10	2	2	1
1	413	9810	1	2	2	0
1	416	9810	2	2	2	0
1	417	9810	3	2	2	0
1	420	9810	4	2	2	0
1	445	9904	1	2	2	0
1	448	9904	2	2	2	0
1	449	9904	3	2	2	0
1	452	9904	4	2	2	0
1	453	9904	5	2	2	0
1	456	9904	6	2	2	1
1	457	9905	1	2	2	0
1	460	9905	2	2	2	0
1	461	9905	3	2	2	0
1	464	9905	4	2	2	0
1	465	9905	5	2	2	0
1	468	9905	6	2	2	0
1	469	9905	7	2	2	0
1	472	9905	8	2	2	0
1	473	9905	9	2	2	0
1	497	9908	1	2	2	0
1	500	9908	2	2	2	0
1	501	9908	3	2	2	0
1	504	9908	4	2	2	0
1	505	9908	5	2	2	0
1	508	9908	6	2	2	0
1	509	9908	7	2	2	0
1	511	9909	1	2	2	0
1	514	9909	2	2	2	0
1	515	9909	3	2	2	0
1	518	9909	4	2	2	0
1	519	9909	5	2	2	0
1	522	9909	6	2	2	0
1	523	9909	7	2	2	0
1	526	9909	8	2	2	0
1	527	9909	9	2	2	0
1	530	9909	10	2	2	1
1	531	9909	11	2	2	0
1	534	9909	12	2	2	0
1	535	9909	13	2	2	0
1	538	9909	14	2	2	0
1	539	9910	1	2	2	0
1	542	9910	2	2	2	0
1	543	9910	3	2	2	1
1	546	9910	4	2	2	0
1	547	9910	5	2	2	0
1	550	9910	6	2	2	0
1	551	9910	7	2	2	0
1	554	9910	8	2	2	0
1	555	9910	9	2	2	0
1	558	9910	10	2	2	0
1	559	9911	1	2	2	0
1	562	9911	2	2	2	0
1	563	9911	4	2	2	1
1	566	9911	5	2	2	0
1	567	9911	6	2	2	0
1	570	9911	7	2	2	0
1	571	9911	8	2	2	0
1	574	9911	9	2	2	1
1	575	9911	10	2	2	1
1	583	9913	2	2	2	0
1	586	9913	4	2	2	0
1	587	9913	5	2	2	0
1	590	9913	6	2	2	0
1	591	9913	9	2	2	0
1	594	9913	10	2	2	0
1	595	9913	11	2	2	0
1	597	9914	1	2	2	0
1	600	9914	2	2	2	0
1	601	9914	3	2	2	0
1	604	9914	4	2	2	0
1	605	9914	5	2	2	0
1	608	9914	6	2	2	0
1	609	9914	7	2	2	0
1	612	9914	9	2	2	0
1	613	9914	10	2	2	1
1	615	9916	1	2	2	0
1	618	9916	2	2	2	0
1	619	9916	3	2	2	0
1	622	9916	6	2	2	0
1	623	9916	8	2	2	0
1	626	9916	9	2	2	0
1	627	9919	1	2	2	0
1	630	9919	2	2	2	0
1	631	9919	4	2	2	1
1	634	9919	5	2	2	0
1	635	9919	6	2	2	0
1	638	9919	7	2	2	1
1	639	9919	8	2	2	0
1	642	9919	9	2	2	1
1	643	9920	1	2	2	0
1	646	9920	2	2	2	1
1	647	9923	5	2	2	1
1	649	9925	1	2	2	1
1	652	9925	2	2	2	1
1	653	9925	3	2	2	1
1	656	9925	4	2	2	0
1	657	9925	5	2	2	0
1	660	9925	6	2	2	0
1	661	9925	7	2	2	0
1	664	9925	8	2	2	0
1	665	9925	9	2	2	0
1	668	9925	10	2	2	0
1	669	9927	2	2	2	0
1	672	9927	3	2	2	1
1	2	96.9	1	2	3	0
1	4	96.9	2	2	3	0
1	6	96.9	3	2	3	0
1	8	96.9	4	2	3	0
1	10	96.9	5	2	3	0
1	16	96.9	8	2	3	0
1	18	96.9	9	2	3	0
1	20	96.9	10	2	3	0
1	29	96.4	1	2	3	0
1	31	96.4	2	2	3	0
1	33	96.4	3	2	3	0
1	35	96.4	4	2	3	0
1	37	96.4	5	2	3	0
1	39	96.4	6	2	3	0
1	41	96.4	7	2	3	0
1	43	96.4	8	2	3	0
1	45	96.4	9	2	3	0
1	47	96.4	10	2	3	0
1	49	96.4	11	2	3	0
1	53	96.5	1	2	3	0
1	55	96.5	2	2	3	0
1	57	96.5	3	2	3	0
1	59	96.5	4	2	3	0
1	61	96.5	5	2	3	0
1	63	96.5	6	2	3	0
1	65	96.5	7	2	3	0
1	67	96.5	8	2	3	0
1	69	96.5	9	2	3	0
1	71	96.5	10	2	3	0
1	73	96.5	11	2	3	0
1	75	96.5	12	2	3	0
1	77	96.5	13	2	3	0
1	79	96.5	14	2	3	0
1	83	96.6	1	2	3	0
1	85	96.6	2	2	3	1
1	87	96.6	3	2	3	0
1	89	96.6	4	2	3	1
1	91	96.6	5	2	3	0
1	93	96.6	6	2	3	1
1	95	96.6	7	2	3	0
1	97	96.6	8	2	3	1
1	99	96.6	9	2	3	1
1	101	96.6	10	2	3	0
1	103	96.6	11	2	3	1
1	105	96.6	12	2	3	1
1	107	96.6	13	2	3	0
1	111	96.6	15	2	3	1
1	115	96.7	1	2	3	0
1	119	96.7	3	2	3	0
1	121	96.7	4	2	3	0
1	123	96.7	5	2	3	1
1	125	96.7	6	2	3	0
1	135	96.7	11	2	3	0
1	140	9610	1	2	3	0
1	142	9610	2	2	3	0
1	144	9610	3	2	3	1
1	146	9610	4	2	3	0
1	148	9610	5	2	3	0
1	150	9610	6	2	3	0
1	152	9610	7	2	3	0
1	154	9610	8	2	3	0
1	156	9610	9	2	3	0
1	158	9610	10	2	3	0
1	160	9610	11	2	3	0
1	236	97.1	1	2	3	0
1	237	97.1	2	2	3	0
1	240	97.1	3	2	3	0
1	241	97.1	4	2	3	0
1	244	97.1	7	2	3	0
1	245	97.1	8	2	3	0
1	248	97.2	1	2	3	0
1	249	97.2	2	2	3	0
1	252	97.2	3	2	3	0
1	253	97.2	4	2	3	0
1	256	97.2	5	2	3	1
1	257	97.2	7	2	3	0
1	259	97.3	1	2	3	0
1	262	97.3	2	2	3	0
1	263	97.3	3	2	3	0
1	266	97.3	4	2	3	1
1	267	97.3	5	2	3	1
1	270	97.3	6	2	3	0
1	271	97.3	7	2	3	0
1	274	97.4	1	2	3	0
1	275	97.4	2	2	3	0
1	278	97.4	3	2	3	0
1	279	97.4	4	2	3	0
1	282	97.4	5	2	3	1
1	283	97.4	6	2	3	0
1	286	97.6	1	2	3	0
1	287	97.6	2	2	3	0
1	290	97.6	4	2	3	0
1	298	97.8	1	2	3	0
1	300	97.9	1	2	3	0
1	301	97.9	2	2	3	0
1	304	97.9	3	2	3	0
1	305	97.9	4	2	3	0
1	308	97.1	1	2	3	0
1	310	97.11	2	2	3	0
1	311	97.11	3	2	3	0
1	314	97.11	4	2	3	0
1	315	97.11	5	2	3	0
1	318	97.11	6	2	3	0
1	319	97.11	7	2	3	0
1	322	97.11		2	3	0
1	323	97.11	9	2	3	0
1	328	98.3	1	2	3	0
1	329	98.3	2	2	3	0
1	332	98.3	3	2	3	1
1	333	98.3	4	2	3	0
1	336	98.3	5	2	3	0
1	338	98.4	1	2	3	0
1	339	98.4	2	2	3	0
1	342	98.4	3	2	3	0
1	343	98.4	4	2	3	0
1	346	98.5	1	2	3	0
1	347	98.5	2	2	3	0
1	350	98.5	3	2	3	0
1	351	98.5	4	2	3	0
1	354	98.5	5	2	3	0
1	355	98.5	6	2	3	0
1	358	98.5	7	2	3	0
1	359	98.5	8	2	3	0
1	362	98.5	9	2	3	0
1	363	98.5	10	2	3	0
1	366	98.5	11	2	3	0
1	367	98.5	12	2	3	0
1	370	98.5	14	2	3	0
1	371	98.5	15	2	3	0
1	374	98.5	16	2	3	0
1	375	98.5	17	2	3	0
1	378	98.5	18	2	3	0
1	379	98.5	19	2	3	0
1	382	98.5	20	2	3	0
1	384	98.6	1	2	3	0
1	385	98.6	2	2	3	0
1	388	98.6	3	2	3	0
1	389	98.6	4	2	3	0
1	392	98.6	5	2	3	0
1	393	98.6	7	2	3	1
1	396	98.6	8	2	3	1
1	397	98.6	9	2	3	1
1	400	98.8	1	2	3	1
1	401	98.8	2	2	3	1
1	404	98.8	3	2	3	0
1	405	98.8	4	2	3	1
1	408	98.8	6	2	3	0
1	409	98.8	8	2	3	0
1	412	98.8	10	2	3	0
1	414	9810	1	2	3	1
1	415	9810	2	2	3	1
1	418	9810	3	2	3	0
1	419	9810	4	2	3	0
1	446	9904	1	2	3	0
1	447	9904	2	2	3	1
1	450	9904	3	2	3	0
1	451	9904	4	2	3	1
1	454	9904	5	2	3	0
1	455	9904	6	2	3	1
1	458	9905	1	2	3	0
1	459	9905	2	2	3	0
1	462	9905	3	2	3	0
1	463	9905	4	2	3	0
1	466	9905	5	2	3	0
1	467	9905	6	2	3	0
1	470	9905	7	2	3	0
1	471	9905	8	2	3	0
1	474	9905	9	2	3	0
1	498	9908	1	2	3	0
1	499	9908	2	2	3	0
1	502	9908	3	2	3	0
1	503	9908	4	2	3	0
1	506	9908	5	2	3	0
1	507	9908	6	2	3	0
1	510	9908	7	2	3	0
1	512	9909	1	2	3	0
1	513	9909	2	2	3	0
1	516	9909	3	2	3	0
1	517	9909	4	2	3	0
1	520	9909	5	2	3	0
1	521	9909	6	2	3	0
1	524	9909	7	2	3	0
1	525	9909	8	2	3	0
1	528	9909	9	2	3	0
1	529	9909	10	2	3	0
1	532	9909	11	2	3	0
1	533	9909	12	2	3	0
1	536	9909	13	2	3	1
1	537	9909	14	2	3	0
1	540	9910	1	2	3	0
1	541	9910	2	2	3	0
1	544	9910	3	2	3	0
1	545	9910	4	2	3	0
1	548	9910	5	2	3	0
1	549	9910	6	2	3	0
1	552	9910	7	2	3	0
1	553	9910	8	2	3	0
1	556	9910	9	2	3	0
1	557	9910	10	2	3	0
1	560	9911	1	2	3	0
1	561	9911	2	2	3	0
1	564	9911	4	2	3	0
1	565	9911	5	2	3	0
1	568	9911	6	2	3	0
1	569	9911	7	2	3	1
1	572	9911	8	2	3	0
1	573	9911	9	2	3	0
1	576	9911	10	2	3	0
1	584	9913	2	2	3	0
1	585	9913	4	2	3	0
1	588	9913	5	2	3	0
1	589	9913	6	2	3	0
1	592	9913	9	2	3	0
1	593	9913	10	2	3	0
1	596	9913	11	2	3	0
1	598	9914	1	2	3	0
1	599	9914	2	2	3	0
1	602	9914	3	2	3	1
1	603	9914	4	2	3	0
1	606	9914	5	2	3	0
1	607	9914	6	2	3	0
1	610	9914	7	2	3	0
1	611	9914	9	2	3	0
1	614	9914	10	2	3	0
1	616	9916	1	2	3	0
1	617	9916	2	2	3	0
1	620	9916	3	2	3	0
1	621	9916	6	2	3	0
1	624	9916	8	2	3	0
1	625	9916	9	2	3	1
1	628	9919	1	2	3	1
1	629	9919	2	2	3	1
1	632	9919	4	2	3	0
1	633	9919	5	2	3	1
1	636	9919	6	2	3	0
1	637	9919	7	2	3	1
1	640	9919	8	2	3	1
1	641	9919	9	2	3	1
1	644	9920	1	2	3	1
1	645	9920	2	2	3	1
1	648	9923	5	2	3	0
1	650	9925	1	2	3	0
1	651	9925	2	2	3	0
1	654	9925	3	2	3	1
1	655	9925	4	2	3	0
1	658	9925	5	2	3	0
1	659	9925	6	2	3	1
1	662	9925	7	2	3	1
1	663	9925	8	2	3	0
1	666	9925	9	2	3	1
1	667	9925	10	2	3	0
1	670	9927	2	2	3	1
1	671	9927	3	2	3	1
1	1	96.9	1	3	2	1
1	3	96.9	2	3	2	0
1	5	96.9	3	3	2	0
1	7	96.9	4	3	2	0
1	9	96.9	5	3	2	0
1	15	96.9	8	3	2	0
1	17	96.9	9	3	2	1
1	19	96.9	10	3	2	0
1	28	96.4	1	3	2	0
1	30	96.4	2	3	2	0
1	32	96.4	3	3	2	0
1	34	96.4	4	3	2	0
1	36	96.4	5	3	2	0
1	38	96.4	6	3	2	0
1	40	96.4	7	3	2	0
1	42	96.4	8	3	2	0
1	44	96.4	9	3	2	0
1	46	96.4	10	3	2	0
1	48	96.4	11	3	2	0
1	52	96.5	1	3	2	0
1	54	96.5	2	3	2	0
1	56	96.5	3	3	2	0
1	58	96.5	4	3	2	1
1	60	96.5	5	3	2	0
1	62	96.5	6	3	2	0
1	64	96.5	7	3	2	1
1	66	96.5	8	3	2	0
1	68	96.5	9	3	2	0
1	70	96.5	10	3	2	0
1	72	96.5	11	3	2	0
1	74	96.5	12	3	2	0
1	76	96.5	13	3	2	0
1	78	96.5	14	3	2	0
1	82	96.6	1	3	2	1
1	84	96.6	2	3	2	1
1	86	96.6	3	3	2	1
1	88	96.6	4	3	2	0
1	90	96.6	5	3	2	1
1	92	96.6	6	3	2	0
1	94	96.6	7	3	2	0
1	96	96.6	8	3	2	0
1	98	96.6	9	3	2	1
1	100	96.6	10	3	2	1
1	102	96.6	11	3	2	1
1	104	96.6	12	3	2	0
1	106	96.6	13	3	2	1
1	110	96.6	15	3	2	0
1	114	96.7	1	3	2	0
1	118	96.7	3	3	2	1
1	120	96.7	4	3	2	1
1	122	96.7	5	3	2	0
1	124	96.7	6	3	2	1
1	134	96.7	11	3	2	0
1	139	9610	1	3	2	0
1	141	9610	2	3	2	0
1	143	9610	3	3	2	0
1	145	9610	4	3	2	0
1	147	9610	5	3	2
1	149	9610	6	3	2	0
1	151	9610	7	3	2	0
1	153	9610	8	3	2	1
1	155	9610	9	3	2	0
1	157	9610	10	3	2	0
1	159	9610	11	3	2	1
1	235	97.1	1	3	2	0
1	238	97.1	2	3	2	0
1	239	97.1	3	3	2	0
1	242	97.1	4	3	2	1
1	243	97.1	7	3	2	0
1	246	97.1	8	3	2	0
1	247	97.2	1	3	2	1
1	250	97.2	2	3	2	0
1	251	97.2	3	3	2	1
1	254	97.2	4	3	2	1
1	255	97.2	5	3	2	1
1	258	97.2	7	3	2	1
1	260	97.3	1	3	2	0
1	261	97.3	2	3	2	1
1	264	97.3	3	3	2	0
1	265	97.3	4	3	2	0
1	268	97.3	5	3	2	1
1	269	97.3	6	3	2	0
1	272	97.3	7	3	2	0
1	273	97.4	1	3	2	1
1	276	97.4	2	3	2	1
1	277	97.4	3	3	2	1
1	280	97.4	4	3	2	0
1	281	97.4	5	3	2	0
1	284	97.4	6	3	2	0
1	285	97.6	1	3	2	0
1	288	97.6	2	3	2	0
1	289	97.6	4	3	2	0
1	297	97.8	1	3	2	0
1	299	97.9	1	3	2	0
1	302	97.9	2	3	2	0
1	303	97.9	3	3	2	0
1	306	97.9	4	3	2	0
1	307	97.1	1	3	2	0
1	309	97.11	2	3	2	0
1	312	97.11	3	3	2	1
1	313	97.11	4	3	2	1
1	316	97.11	5	3	2	0
1	317	97.11	6	3	2	0
1	320	97.11	7	3	2	0
1	321	97.11	8	3	2	0
1	324	97.11		3	2	0
1	327	98.3	1	3	2	0
1	330	98.3	2	3	2	1
1	331	98.3	3	3	2	0
1	334	98.3	4	3	2	0
1	335	98.3	5	3	2	0
1	337	98.4	1	3	2	0
1	340	98.4	2	3	2	0
1	341	98.4	3	3	2	0
1	344	98.4	4	3	2	0
1	345	98.5	1	3	2	0
1	348	98.5	2	3	2	0
1	349	98.5	3	3	2	0
1	352	98.5	4	3	2	0
1	353	98.5	5	3	2	0
1	356	98.5	6	3	2	0
1	357	98.5	7	3	2	0
1	360	98.5	8	3	2	0
1	361	98.5	9	3	2	0
1	364	98.5	10	3	2	1
1	365	98.5	11	3	2	0
1	368	98.5	12	3	2	0
1	369	98.5	14	3	2	0
1	372	98.5	15	3	2	0
1	373	98.5	16	3	2	0
1	376	98.5	17	3	2	0
1	377	98.5	18	3	2	0
1	380	98.5	19	3	2	0
1	381	98.5	20	3	2	0
1	383	98.6	1	3	2	1
1	386	98.6	2	3	2	0
1	387	98.6	3	3	2	0
1	390	98.6	4	3	2	0
1	391	98.6	5	3	2	0
1	394	98.6	7	3	2	1
1	395	98.6	8	3	2	1
1	398	98.6	9	3	2	1
1	399	98.8	1	3	2	0
1	402	98.8	2	3	2	0
1	403	98.8	3	3	2	0
1	406	98.8	4	3	2	0
1	407	98.8	6	3	2	0
1	410	98.8	8	3	2	0
1	411	98.8	10	3	2	0
1	413	9810	1	3	2	0
1	416	9810	2	3	2	0
1	417	9810	3	3	2	0
1	420	9810	4	3	2	0
1	445	9904	1	3	2	0
1	448	9904	2	3	2	0
1	449	9904	3	3	2	0
1	452	9904	4	3	2	0
1	453	9904	5	3	2	0
1	456	9904	6	3	2	1
1	457	9905	1	3	2	0
1	460	9905	2	3	2	0
1	461	9905	3	3	2	0
1	464	9905	4	3	2	0
1	465	9905	5	3	2	0
1	468	9905	6	3	2	0
1	469	9905	7	3	2	0
1	472	9905	8	3	2	0
1	473	9905	9	3	2	0
1	497	9908	1	3	2	0
1	500	9908	2	3	2	0
1	501	9908	3	3	2	0
1	504	9908	4	3	2	0
1	505	9908	5	3	2	0
1	508	9908	6	3	2	0
1	509	9908	7	3	2	0
1	511	9909	1	3	2	0
1	514	9909	2	3	2	0
1	515	9909	3	3	2	0
1	518	9909	4	3	2	0
1	519	9909	5	3	2	0
1	522	9909	6	3	2	0
1	523	9909	7	3	2	0
1	526	9909	8	3	2	0
1	527	9909	9	3	2	0
1	530	9909	10	3	2	0
1	531	9909	11	3	2	0
1	534	9909	12	3	2	0
1	535	9909	13	3	2	0
1	538	9909	14	3	2	0
1	539	9910	1	3	2	0
1	542	9910	2	3	2	0
1	543	9910	3	3	2	0
1	546	9910	4	3	2	0
1	547	9910	5	3	2	0
1	550	9910	6	3	2	0
1	551	9910	7	3	2	0
1	554	9910	8	3	2	0
1	555	9910	9	3	2	0
1	558	9910	10	3	2	0
1	559	9911	1	3	2	0
1	562	9911	2	3	2	0
1	563	9911	4	3	2	0
1	566	9911	5	3	2	1
1	567	9911	6	3	2	1
1	570	9911	7	3	2	0
1	571	9911	8	3	2	0
1	574	9911	9	3	2	0
1	575	9911	10	3	2	0
1	583	9913	2	3	2	0
1	586	9913	4	3	2	0
1	587	9913	5	3	2	0
1	590	9913	6	3	2	1
1	591	9913	9	3	2	0
1	594	9913	10	3	2	0
1	595	9913	11	3	2	0
1	597	9914	1	3	2	0
1	600	9914	2	3	2	0
1	601	9914	3	3	2	0
1	604	9914	4	3	2	0
1	605	9914	5	3	2	0
1	608	9914	6	3	2	0
1	609	9914	7	3	2	0
1	612	9914	9	3	2	1
1	613	9914	10	3	2	0
1	615	9916	1	3	2	1
1	618	9916	2	3	2	0
1	619	9916	3	3	2	0
1	622	9916	6	3	2	0
1	623	9916	8	3	2	0
1	626	9916	9	3	2	0
1	627	9919	1	3	2	0
1	630	9919	2	3	2	0
1	631	9919	4	3	2	0
1	634	9919	5	3	2	0
1	635	9919	6	3	2	0
1	638	9919	7	3	2	0
1	639	9919	8	3	2	0
1	642	9919	9	3	2	0
1	643	9920	1	3	2	0
1	646	9920	2	3	2	0
1	647	9923	5	3	2	0
1	649	9925	1	3	2	1
1	652	9925	2	3	2	0
1	653	9925	3	3	2	1
1	656	9925	4	3	2	1
1	657	9925	5	3	2	0
1	660	9925	6	3	2	0
1	661	9925	7	3	2	0
1	664	9925	8	3	2	1
1	665	9925	9	3	2	0
1	668	9925	10	3	2	0
1	669	9927	2	3	2	0
1	672	9927	3	3	2	0
1	2	96.9	1	3	3	0
1	4	96.9	2	3	3	0
1	6	96.9	3	3	3	0
1	8	96.9	4	3	3	0
1	10	96.9	5	3	3	0
1	16	96.9	8	3	3	0
1	18	96.9	9	3	3	0
1	20	96.9	10	3	3	0
1	29	96.4	1	3	3	0
1	31	96.4	2	3	3	0
1	33	96.4	3	3	3	0
1	35	96.4	4	3	3	0
1	37	96.4	5	3	3	0
1	39	96.4	6	3	3	0
1	41	96.4	7	3	3	0
1	43	96.4	8	3	3	0
1	45	96.4	9	3	3	0
1	47	96.4	10	3	3	0
1	49	96.4	11	3	3	0
1	53	96.5	1	3	3	0
1	55	96.5	2	3	3	1
1	57	96.5	3	3	3	0
1	59	96.5	4	3	3	1
1	61	96.5	5	3	3	0
1	63	96.5	6	3	3	0
1	65	96.5	7	3	3	0
1	67	96.5	8	3	3	0
1	69	96.5	9	3	3	0
1	71	96.5	10	3	3	0
1	73	96.5	11	3	3	0
1	75	96.5	12	3	3	0
1	77	96.5	13	3	3	0
1	79	96.5	14	3	3	0
1	83	96.6	1	3	3	0
1	85	96.6	2	3	3	1
1	87	96.6	3	3	3	0
1	89	96.6	4	3	3	0
1	91	96.6	5	3	3	0
1	93	96.6	6	3	3	0
1	95	96.6	7	3	3	0
1	97	96.6	8	3	3	0
1	99	96.6	9	3	3	0
1	101	96.6	10	3	3	0
1	103	96.6	11	3	3	1
1	105	96.6	12	3	3	0
1	107	96.6	13	3	3	0
1	111	96.6	15	3	3	1
1	115	96.7	1	3	3	0
1	119	96.7	3	3	3	0
1	121	96.7	4	3	3	0
1	123	96.7	5	3	3	1
1	125	96.7	6	3	3	0
1	135	96.7	11	3	3	0
1	140	9610	1	3	3	0
1	142	9610	2	3	3	0
1	144	9610	3	3	3	1
1	146	9610	4	3	3	0
1	148	9610	5	3	3
1	150	9610	6	3	3	0
1	152	9610	7	3	3	0
1	154	9610	8	3	3	0
1	156	9610	9	3	3	0
1	158	9610	10	3	3	0
1	160	9610	11	3	3	1
1	236	97.1	1	3	3	0
1	237	97.1	2	3	3	0
1	240	97.1	3	3	3	0
1	241	97.1	4	3	3	0
1	244	97.1	7	3	3	0
1	245	97.1	8	3	3	0
1	248	97.2	1	3	3	0
1	249	97.2	2	3	3	0
1	252	97.2	3	3	3	0
1	253	97.2	4	3	3	1
1	256	97.2	5	3	3	0
1	257	97.2	7	3	3	0
1	259	97.3	1	3	3	0
1	262	97.3	2	3	3	0
1	263	97.3	3	3	3	0
1	266	97.3	4	3	3	0
1	267	97.3	5	3	3	1
1	270	97.3	6	3	3	0
1	271	97.3	7	3	3	0
1	274	97.4	1	3	3	0
1	275	97.4	2	3	3	0
1	278	97.4	3	3	3	1
1	279	97.4	4	3	3	0
1	282	97.4	5	3	3	0
1	283	97.4	6	3	3	0
1	286	97.6	1	3	3	0
1	287	97.6	2	3	3	0
1	290	97.6	4	3	3	0
1	298	97.8	1	3	3	0
1	300	97.9	1	3	3	0
1	301	97.9	2	3	3	0
1	304	97.9	3	3	3	0
1	305	97.9	4	3	3	1
1	308	97.1	1	3	3	0
1	310	97.11	2	3	3	0
1	311	97.11	3	3	3	0
1	314	97.11	4	3	3	0
1	315	97.11	5	3	3	0
1	318	97.11	6	3	3	0
1	319	97.11	7	3	3	0
1	322	97.11		3	3	1
1	323	97.11	9	3	3	0
1	328	98.3	1	3	3	0
1	329	98.3	2	3	3	0
1	332	98.3	3	3	3	0
1	333	98.3	4	3	3	0
1	336	98.3	5	3	3	0
1	338	98.4	1	3	3	0
1	339	98.4	2	3	3	0
1	342	98.4	3	3	3	0
1	343	98.4	4	3	3	0
1	346	98.5	1	3	3	0
1	347	98.5	2	3	3	0
1	350	98.5	3	3	3	1
1	351	98.5	4	3	3	0
1	354	98.5	5	3	3	0
1	355	98.5	6	3	3	0
1	358	98.5	7	3	3	0
1	359	98.5	8	3	3	0
1	362	98.5	9	3	3	0
1	363	98.5	10	3	3	0
1	366	98.5	11	3	3	0
1	367	98.5	12	3	3	0
1	370	98.5	14	3	3	1
1	371	98.5	15	3	3	0
1	374	98.5	16	3	3	0
1	375	98.5	17	3	3	0
1	378	98.5	18	3	3	0
1	379	98.5	19	3	3	0
1	382	98.5	20	3	3	0
1	384	98.6	1	3	3	0
1	385	98.6	2	3	3	0
1	388	98.6	3	3	3	0
1	389	98.6	4	3	3	0
1	392	98.6	5	3	3	1
1	393	98.6	7	3	3	0
1	396	98.6	8	3	3	0
1	397	98.6	9	3	3	0
1	400	98.8	1	3	3	0
1	401	98.8	2	3	3	0
1	404	98.8	3	3	3	0
1	405	98.8	4	3	3	0
1	408	98.8	6	3	3	0
1	409	98.8	8	3	3	0
1	412	98.8	10	3	3	0
1	414	9810	1	3	3	0
1	415	9810	2	3	3	0
1	418	9810	3	3	3	0
1	419	9810	4	3	3	0
1	446	9904	1	3	3	0
1	447	9904	2	3	3	0
1	450	9904	3	3	3	0
1	451	9904	4	3	3	0
1	454	9904	5	3	3	0
1	455	9904	6	3	3	0
1	458	9905	1	3	3	0
1	459	9905	2	3	3	0
1	462	9905	3	3	3	0
1	463	9905	4	3	3	0
1	466	9905	5	3	3	0
1	467	9905	6	3	3	0
1	470	9905	7	3	3	0
1	471	9905	8	3	3	0
1	474	9905	9	3	3	0
1	498	9908	1	3	3	0
1	499	9908	2	3	3	0
1	502	9908	3	3	3	0
1	503	9908	4	3	3	0
1	506	9908	5	3	3	0
1	507	9908	6	3	3	0
1	510	9908	7	3	3	0
1	512	9909	1	3	3	0
1	513	9909	2	3	3	0
1	516	9909	3	3	3	0
1	517	9909	4	3	3	0
1	520	9909	5	3	3	0
1	521	9909	6	3	3	0
1	524	9909	7	3	3	0
1	525	9909	8	3	3	0
1	528	9909	9	3	3	0
1	529	9909	10	3	3	0
1	532	9909	11	3	3	0
1	533	9909	12	3	3	0
1	536	9909	13	3	3	0
1	537	9909	14	3	3	0
1	540	9910	1	3	3	1
1	541	9910	2	3	3	0
1	544	9910	3	3	3	1
1	545	9910	4	3	3	0
1	548	9910	5	3	3	1
1	549	9910	6	3	3	0
1	552	9910	7	3	3	0
1	553	9910	8	3	3	0
1	556	9910	9	3	3	0
1	557	9910	10	3	3	0
1	560	9911	1	3	3	0
1	561	9911	2	3	3	0
1	564	9911	4	3	3	0
1	565	9911	5	3	3	0
1	568	9911	6	3	3	0
1	569	9911	7	3	3	0
1	572	9911	8	3	3	0
1	573	9911	9	3	3	0
1	576	9911	10	3	3	0
1	584	9913	2	3	3	0
1	585	9913	4	3	3	0
1	588	9913	5	3	3	0
1	589	9913	6	3	3	0
1	592	9913	9	3	3	0
1	593	9913	10	3	3	0
1	596	9913	11	3	3	0
1	598	9914	1	3	3	1
1	599	9914	2	3	3	0
1	602	9914	3	3	3	0
1	603	9914	4	3	3	0
1	606	9914	5	3	3	0
1	607	9914	6	3	3	0
1	610	9914	7	3	3	0
1	611	9914	9	3	3	0
1	614	9914	10	3	3	1
1	616	9916	1	3	3	0
1	617	9916	2	3	3	0
1	620	9916	3	3	3	0
1	621	9916	6	3	3	0
1	624	9916	8	3	3	0
1	625	9916	9	3	3	0
1	628	9919	1	3	3	0
1	629	9919	2	3	3	0
1	632	9919	4	3	3	0
1	633	9919	5	3	3	0
1	636	9919	6	3	3	0
1	637	9919	7	3	3	0
1	640	9919	8	3	3	0
1	641	9919	9	3	3	0
1	644	9920	1	3	3	0
1	645	9920	2	3	3	0
1	648	9923	5	3	3	0
1	650	9925	1	3	3	0
1	651	9925	2	3	3	1
1	654	9925	3	3	3	0
1	655	9925	4	3	3	0
1	658	9925	5	3	3	0
1	659	9925	6	3	3	1
1	662	9925	7	3	3	1
1	663	9925	8	3	3	0
1	666	9925	9	3	3	0
1	667	9925	10	3	3	0
1	670	9927	2	3	3	0
1	671	9927	3	3	3	0
1	1	96.9	1	4	2	0
1	3	96.9	2	4	2	1
1	5	96.9	3	4	2	0
1	7	96.9	4	4	2	0
1	9	96.9	5	4	2	0
1	15	96.9	8	4	2	0
1	17	96.9	9	4	2	0
1	19	96.9	10	4	2	0
1	28	96.4	1	4	2	0
1	30	96.4	2	4	2	0
1	32	96.4	3	4	2	0
1	34	96.4	4	4	2	1
1	36	96.4	5	4	2	0
1	38	96.4	6	4	2	0
1	40	96.4	7	4	2	0
1	42	96.4	8	4	2	0
1	44	96.4	9	4	2	0
1	46	96.4	10	4	2	0
1	48	96.4	11	4	2	0
1	52	96.5	1	4	2	0
1	54	96.5	2	4	2	0
1	56	96.5	3	4	2	0
1	58	96.5	4	4	2	0
1	60	96.5	5	4	2	0
1	62	96.5	6	4	2	0
1	64	96.5	7	4	2	0
1	66	96.5	8	4	2	0
1	68	96.5	9	4	2	0
1	70	96.5	10	4	2	0
1	72	96.5	11	4	2	1
1	74	96.5	12	4	2	1
1	76	96.5	13	4	2	0
1	78	96.5	14	4	2	0
1	82	96.6	1	4	2	1
1	84	96.6	2	4	2	1
1	86	96.6	3	4	2	0
1	88	96.6	4	4	2	1
1	90	96.6	5	4	2	0
1	92	96.6	6	4	2	0
1	94	96.6	7	4	2	0
1	96	96.6	8	4	2	0
1	98	96.6	9	4	2	1
1	100	96.6	10	4	2	0
1	102	96.6	11	4	2	0
1	104	96.6	12	4	2	0
1	106	96.6	13	4	2	1
1	110	96.6	15	4	2	0
1	114	96.7	1	4	2	1
1	118	96.7	3	4	2	1
1	120	96.7	4	4	2	0
1	122	96.7	5	4	2	0
1	124	96.7	6	4	2	1
1	134	96.7	11	4	2	0
1	139	9610	1	4	2	0
1	141	9610	2	4	2	0
1	143	9610	3	4	2	0
1	145	9610	4	4	2	0
1	147	9610	5	4	2
1	149	9610	6	4	2	0
1	151	9610	7	4	2	0
1	153	9610	8	4	2	0
1	155	9610	9	4	2	0
1	157	9610	10	4	2	0
1	159	9610	11	4	2	0
1	235	97.1	1	4	2	0
1	238	97.1	2	4	2	0
1	239	97.1	3	4	2	0
1	242	97.1	4	4	2	0
1	243	97.1	7	4	2	0
1	246	97.1	8	4	2	0
1	247	97.2	1	4	2	0
1	250	97.2	2	4	2	0
1	251	97.2	3	4	2	1
1	254	97.2	4	4	2	0
1	255	97.2	5	4	2	0
1	258	97.2	7	4	2	0
1	260	97.3	1	4	2	0
1	261	97.3	2	4	2	0
1	264	97.3	3	4	2	0
1	265	97.3	4	4	2	0
1	268	97.3	5	4	2	1
1	269	97.3	6	4	2	0
1	272	97.3	7	4	2	0
1	273	97.4	1	4	2	1
1	276	97.4	2	4	2	0
1	277	97.4	3	4	2	0
1	280	97.4	4	4	2	0
1	281	97.4	5	4	2	1
1	284	97.4	6	4	2	0
1	285	97.6	1	4	2	0
1	288	97.6	2	4	2	0
1	289	97.6	4	4	2	0
1	297	97.8	1	4	2	0
1	299	97.9	1	4	2	0
1	302	97.9	2	4	2	0
1	303	97.9	3	4	2	0
1	306	97.9	4	4	2	0
1	307	97.1	1	4	2	0
1	309	97.11	2	4	2	0
1	312	97.11	3	4	2	1
1	313	97.11	4	4	2	0
1	316	97.11	5	4	2	0
1	317	97.11	6	4	2	0
1	320	97.11	7	4	2	0
1	321	97.11	8	4	2	1
1	324	97.11		4	2	0
1	327	98.3	1	4	2	0
1	330	98.3	2	4	2	0
1	331	98.3	3	4	2	0
1	334	98.3	4	4	2	0
1	335	98.3	5	4	2	0
1	337	98.4	1	4	2	1
1	340	98.4	2	4	2	0
1	341	98.4	3	4	2	0
1	344	98.4	4	4	2	0
1	345	98.5	1	4	2	0
1	348	98.5	2	4	2	0
1	349	98.5	3	4	2	0
1	352	98.5	4	4	2	0
1	353	98.5	5	4	2	0
1	356	98.5	6	4	2	0
1	357	98.5	7	4	2	0
1	360	98.5	8	4	2	0
1	361	98.5	9	4	2	0
1	364	98.5	10	4	2	0
1	365	98.5	11	4	2	1
1	368	98.5	12	4	2	1
1	369	98.5	14	4	2	0
1	372	98.5	15	4	2	0
1	373	98.5	16	4	2	0
1	376	98.5	17	4	2	0
1	377	98.5	18	4	2	1
1	380	98.5	19	4	2	0
1	381	98.5	20	4	2	0
1	383	98.6	1	4	2	0
1	386	98.6	2	4	2	0
1	387	98.6	3	4	2	0
1	390	98.6	4	4	2	0
1	391	98.6	5	4	2	0
1	394	98.6	7	4	2	0
1	395	98.6	8	4	2	0
1	398	98.6	9	4	2	0
1	399	98.8	1	4	2	1
1	402	98.8	2	4	2	0
1	403	98.8	3	4	2	0
1	406	98.8	4	4	2	0
1	407	98.8	6	4	2	0
1	410	98.8	8	4	2	0
1	411	98.8	10	4	2	0
1	413	9810	1	4	2	0
1	416	9810	2	4	2	0
1	417	9810	3	4	2	0
1	420	9810	4	4	2	0
1	445	9904	1	4	2	1
1	448	9904	2	4	2	0
1	449	9904	3	4	2	0
1	452	9904	4	4	2	1
1	453	9904	5	4	2	1
1	456	9904	6	4	2	0
1	457	9905	1	4	2	1
1	460	9905	2	4	2	0
1	461	9905	3	4	2	0
1	464	9905	4	4	2	0
1	465	9905	5	4	2	0
1	468	9905	6	4	2	0
1	469	9905	7	4	2	0
1	472	9905	8	4	2	0
1	473	9905	9	4	2	0
1	497	9908	1	4	2	0
1	500	9908	2	4	2	0
1	501	9908	3	4	2	0
1	504	9908	4	4	2	0
1	505	9908	5	4	2	0
1	508	9908	6	4	2	0
1	509	9908	7	4	2	0
1	511	9909	1	4	2	0
1	514	9909	2	4	2	0
1	515	9909	3	4	2	0
1	518	9909	4	4	2	0
1	519	9909	5	4	2	0
1	522	9909	6	4	2	1
1	523	9909	7	4	2	0
1	526	9909	8	4	2	0
1	527	9909	9	4	2	0
1	530	9909	10	4	2	0
1	531	9909	11	4	2	0
1	534	9909	12	4	2	1
1	535	9909	13	4	2	0
1	538	9909	14	4	2	0
1	539	9910	1	4	2	0
1	542	9910	2	4	2	0
1	543	9910	3	4	2	0
1	546	9910	4	4	2	0
1	547	9910	5	4	2	0
1	550	9910	6	4	2	0
1	551	9910	7	4	2	0
1	554	9910	8	4	2	0
1	555	9910	9	4	2	0
1	558	9910	10	4	2	0
1	559	9911	1	4	2
1	562	9911	2	4	2
1	563	9911	4	4	2
1	566	9911	5	4	2
1	567	9911	6	4	2
1	570	9911	7	4	2
1	571	9911	8	4	2
1	574	9911	9	4	2
1	575	9911	10	4	2
1	583	9913	2	4	2	0
1	586	9913	4	4	2	0
1	587	9913	5	4	2	0
1	590	9913	6	4	2	0
1	591	9913	9	4	2	0
1	594	9913	10	4	2	0
1	595	9913	11	4	2	1
1	597	9914	1	4	2	0
1	600	9914	2	4	2	0
1	601	9914	3	4	2	0
1	604	9914	4	4	2	0
1	605	9914	5	4	2	0
1	608	9914	6	4	2	0
1	609	9914	7	4	2	0
1	612	9914	9	4	2	1
1	613	9914	10	4	2	0
1	615	9916	1	4	2	1
1	618	9916	2	4	2	0
1	619	9916	3	4	2	0
1	622	9916	6	4	2	0
1	623	9916	8	4	2	0
1	626	9916	9	4	2	0
1	627	9919	1	4	2	1
1	630	9919	2	4	2	0
1	631	9919	4	4	2	1
1	634	9919	5	4	2	1
1	635	9919	6	4	2	0
1	638	9919	7	4	2	1
1	639	9919	8	4	2	0
1	642	9919	9	4	2	1
1	643	9920	1	4	2	0
1	646	9920	2	4	2	0
1	647	9923	5	4	2	0
1	649	9925	1	4	2	0
1	652	9925	2	4	2	0
1	653	9925	3	4	2	0
1	656	9925	4	4	2	0
1	657	9925	5	4	2	0
1	660	9925	6	4	2	0
1	661	9925	7	4	2	0
1	664	9925	8	4	2	0
1	665	9925	9	4	2	0
1	668	9925	10	4	2	0
1	669	9927	2	4	2	0
1	672	9927	3	4	2	0
1	2	96.9	1	4	3	0
1	4	96.9	2	4	3	0
1	6	96.9	3	4	3	0
1	8	96.9	4	4	3	1
1	10	96.9	5	4	3	0
1	16	96.9	8	4	3	0
1	18	96.9	9	4	3	0
1	20	96.9	10	4	3	0
1	29	96.4	1	4	3	0
1	31	96.4	2	4	3	0
1	33	96.4	3	4	3	0
1	35	96.4	4	4	3	0
1	37	96.4	5	4	3	0
1	39	96.4	6	4	3	0
1	41	96.4	7	4	3	0
1	43	96.4	8	4	3	0
1	45	96.4	9	4	3	0
1	47	96.4	10	4	3	0
1	49	96.4	11	4	3	0
1	53	96.5	1	4	3	0
1	55	96.5	2	4	3	0
1	57	96.5	3	4	3	0
1	59	96.5	4	4	3	0
1	61	96.5	5	4	3	0
1	63	96.5	6	4	3	0
1	65	96.5	7	4	3	0
1	67	96.5	8	4	3	1
1	69	96.5	9	4	3	0
1	71	96.5	10	4	3	0
1	73	96.5	11	4	3	0
1	75	96.5	12	4	3	0
1	77	96.5	13	4	3	0
1	79	96.5	14	4	3	0
1	83	96.6	1	4	3	0
1	85	96.6	2	4	3	0
1	87	96.6	3	4	3	1
1	89	96.6	4	4	3	0
1	91	96.6	5	4	3	0
1	93	96.6	6	4	3	1
1	95	96.6	7	4	3	0
1	97	96.6	8	4	3	0
1	99	96.6	9	4	3	1
1	101	96.6	10	4	3	0
1	103	96.6	11	4	3	0
1	105	96.6	12	4	3	1
1	107	96.6	13	4	3	0
1	111	96.6	15	4	3	0
1	115	96.7	1	4	3	1
1	119	96.7	3	4	3	0
1	121	96.7	4	4	3	0
1	123	96.7	5	4	3	0
1	125	96.7	6	4	3	0
1	135	96.7	11	4	3	0
1	140	9610	1	4	3	0
1	142	9610	2	4	3	0
1	144	9610	3	4	3	0
1	146	9610	4	4	3	0
1	148	9610	5	4	3
1	150	9610	6	4	3	0
1	152	9610	7	4	3	0
1	154	9610	8	4	3	0
1	156	9610	9	4	3	0
1	158	9610	10	4	3	0
1	160	9610	11	4	3	0
1	236	97.1	1	4	3	0
1	237	97.1	2	4	3	0
1	240	97.1	3	4	3	0
1	241	97.1	4	4	3	0
1	244	97.1	7	4	3	0
1	245	97.1	8	4	3	0
1	248	97.2	1	4	3	0
1	249	97.2	2	4	3	0
1	252	97.2	3	4	3	0
1	253	97.2	4	4	3	0
1	256	97.2	5	4	3	0
1	257	97.2	7	4	3	0
1	259	97.3	1	4	3	0
1	262	97.3	2	4	3	0
1	263	97.3	3	4	3	0
1	266	97.3	4	4	3	0
1	267	97.3	5	4	3	1
1	270	97.3	6	4	3	0
1	271	97.3	7	4	3	0
1	274	97.4	1	4	3	0
1	275	97.4	2	4	3	1
1	278	97.4	3	4	3	0
1	279	97.4	4	4	3	1
1	282	97.4	5	4	3	0
1	283	97.4	6	4	3	0
1	286	97.6	1	4	3	0
1	287	97.6	2	4	3	0
1	290	97.6	4	4	3	0
1	298	97.8	1	4	3	0
1	300	97.9	1	4	3	0
1	301	97.9	2	4	3	0
1	304	97.9	3	4	3	0
1	305	97.9	4	4	3	1
1	308	97.1	1	4	3	0
1	310	97.11	2	4	3	0
1	311	97.11	3	4	3	0
1	314	97.11	4	4	3	0
1	315	97.11	5	4	3	0
1	318	97.11	6	4	3	0
1	319	97.11	7	4	3	0
1	322	97.11		4	3	0
1	323	97.11	9	4	3	0
1	328	98.3	1	4	3	0
1	329	98.3	2	4	3	0
1	332	98.3	3	4	3	0
1	333	98.3	4	4	3	0
1	336	98.3	5	4	3	0
1	338	98.4	1	4	3	1
1	339	98.4	2	4	3	0
1	342	98.4	3	4	3	0
1	343	98.4	4	4	3	1
1	346	98.5	1	4	3	0
1	347	98.5	2	4	3	0
1	350	98.5	3	4	3	0
1	351	98.5	4	4	3	0
1	354	98.5	5	4	3	0
1	355	98.5	6	4	3	0
1	358	98.5	7	4	3	0
1	359	98.5	8	4	3	0
1	362	98.5	9	4	3	0
1	363	98.5	10	4	3	0
1	366	98.5	11	4	3	0
1	367	98.5	12	4	3	0
1	370	98.5	14	4	3	0
1	371	98.5	15	4	3	0
1	374	98.5	16	4	3	0
1	375	98.5	17	4	3	0
1	378	98.5	18	4	3	0
1	379	98.5	19	4	3	0
1	382	98.5	20	4	3	0
1	384	98.6	1	4	3	0
1	385	98.6	2	4	3	0
1	388	98.6	3	4	3	0
1	389	98.6	4	4	3	0
1	392	98.6	5	4	3	0
1	393	98.6	7	4	3	0
1	396	98.6	8	4	3	0
1	397	98.6	9	4	3	0
1	400	98.8	1	4	3	0
1	401	98.8	2	4	3	1
1	404	98.8	3	4	3	0
1	405	98.8	4	4	3	1
1	408	98.8	6	4	3	0
1	409	98.8	8	4	3	0
1	412	98.8	10	4	3	1
1	414	9810	1	4	3	0
1	415	9810	2	4	3	0
1	418	9810	3	4	3	0
1	419	9810	4	4	3	0
1	446	9904	1	4	3	1
1	447	9904	2	4	3	0
1	450	9904	3	4	3	0
1	451	9904	4	4	3	0
1	454	9904	5	4	3	0
1	455	9904	6	4	3	1
1	458	9905	1	4	3	0
1	459	9905	2	4	3	0
1	462	9905	3	4	3	0
1	463	9905	4	4	3	1
1	466	9905	5	4	3	0
1	467	9905	6	4	3	0
1	470	9905	7	4	3	0
1	471	9905	8	4	3	0
1	474	9905	9	4	3	0
1	498	9908	1	4	3	0
1	499	9908	2	4	3	0
1	502	9908	3	4	3	0
1	503	9908	4	4	3	0
1	506	9908	5	4	3	0
1	507	9908	6	4	3	0
1	510	9908	7	4	3	0
1	512	9909	1	4	3	0
1	513	9909	2	4	3	0
1	516	9909	3	4	3	0
1	517	9909	4	4	3	0
1	520	9909	5	4	3	0
1	521	9909	6	4	3	0
1	524	9909	7	4	3	0
1	525	9909	8	4	3	0
1	528	9909	9	4	3	0
1	529	9909	10	4	3	0
1	532	9909	11	4	3	0
1	533	9909	12	4	3	0
1	536	9909	13	4	3	0
1	537	9909	14	4	3	0
1	540	9910	1	4	3	0
1	541	9910	2	4	3	0
1	544	9910	3	4	3	0
1	545	9910	4	4	3	0
1	548	9910	5	4	3	0
1	549	9910	6	4	3	0
1	552	9910	7	4	3	0
1	553	9910	8	4	3	0
1	556	9910	9	4	3	0
1	557	9910	10	4	3	0
1	560	9911	1	4	3
1	561	9911	2	4	3
1	564	9911	4	4	3
1	565	9911	5	4	3
1	568	9911	6	4	3
1	569	9911	7	4	3
1	572	9911	8	4	3
1	573	9911	9	4	3
1	576	9911	10	4	3
1	584	9913	2	4	3	0
1	585	9913	4	4	3	0
1	588	9913	5	4	3	0
1	589	9913	6	4	3	0
1	592	9913	9	4	3	0
1	593	9913	10	4	3	0
1	596	9913	11	4	3	0
1	598	9914	1	4	3	0
1	599	9914	2	4	3	0
1	602	9914	3	4	3	1
1	603	9914	4	4	3	0
1	606	9914	5	4	3	0
1	607	9914	6	4	3	0
1	610	9914	7	4	3	0
1	611	9914	9	4	3	1
1	614	9914	10	4	3	0
1	616	9916	1	4	3	0
1	617	9916	2	4	3	0
1	620	9916	3	4	3	0
[truncated: 1,102 more rows]

## Sheet: fish-ingestion
Ingestion test: number of ingested pieces of fish, offered in day 1 and 7
population	litter	snake	fish day 1	fish day 7
1	96.9	1	1	0
1	96.9	2	0	1
1	96.9	3	0	0
1	96.9	4	1	0
1	96.9	5	1	1
1	96.9	6
1	96.9	7
1	96.9	8	0	0
1	96.9	9	0	1
1	96.9	10	1	1
1	96.9	11
1	96.9	12
1	96.9	13
1	96.4	1	0	1
1	96.4	2	0	0
1	96.4	3	0	0
1	96.4	4	0	0
1	96.4	5	1	0
1	96.4	6	0	0
1	96.4	7	0	0
1	96.4	8	0	0
1	96.4	9	1	0
1	96.4	10	0	0
1	96.4	11	0	0
1	96.5	1	1	0
1	96.5	2	0	0
1	96.5	3	1	0
1	96.5	4	0	0
1	96.5	5	0	1
1	96.5	6	0	1
1	96.5	7	0	0
1	96.5	8	0	1
1	96.5	9	0	1
1	96.5	10	1	0
1	96.5	11	0	0
1	96.5	12	0	1
1	96.5	13	1	0
1	96.5	14	1	1
1	96.6	1	0	1
1	96.6	2	1	1
1	96.6	3	1	1
1	96.6	4	0	0
1	96.6	5	0	1
1	96.6	6	1	0
1	96.6	7	0	1
1	96.6	8	1	1
1	96.6	9	1	1
1	96.6	10	1	1
1	96.6	11	0	1
1	96.6	12	1	1
1	96.6	13	0	1
1	96.6	14	1
1	96.6	15	0	0
1	96.7	1	0	0
1	96.7	2
1	96.7	3	1	1
1	96.7	4	1	1
1	96.7	5	0	0
1	96.7	6	1	1
1	96.7	7
1	96.7	8
1	96.7	9
1	96.7	10
1	96.7	11	0	0
1	96.7	12
1	9610	1	0	0
1	9610	2	0	0
1	9610	3	0	1
1	9610	4	1	0
1	9610	5
1	9610	6	0	1
1	9610	7	1	0
1	9610	8	0	0
1	9610	9	1	1
1	9610	10
1	9610	11	0	1
2	I	1	0	0
2	I	2	0	0
2	I	3	0	0
2	I	4	0	1
2	I	1	0	0
2	III	1	1	1
2	III	2	1	1
2	III	3	0	0
2	III	4	1	0
2	III	5	1	1
2	III	6	0	0
2	III	7	1	1
2	III	8	0	1
2	I	1	1	1
2	I	2
2	I	3
2	I	4	1	1
2	I	5
2	I	1	1	1
2	III	1	1	1
2	III	2	1	1
2	III	3	1	1
2	III	4	1	1
2	III	5	1	1
2	III	6	1	1
2	III	7	1	1
2	III	8	1	1
2	IV	1	1	1
2	IV	3	1	1
2	IV	4
2	IV	5	1
1	97.1	1	0	0
1	97.1	2	0	0
1	97.1	3	0	0
1	97.1	8	0	1
1	97.3	4	0	1
1	97.3	6	0	1
1	97.4	3	0	0
1	97.4	5	0	0
1	97.6	4	0	1
1	97.8	1	0	1
1	97.9	1	0	0
1	97.9	2	0	0
1	97.9	3	0	0
1	97.9	4	0	0
1	97.1	1	0	1
1	97.11	2	0	0
1	97.11	6	0	0
1	97.11	9	0	0
1	97.1	4	1	1
1	97.1	7	1	0
1	97.2	1	1	1
1	97.2	2	1
1	97.2	3	1	1
1	97.2	4	1	1
1	97.2	7	1	1
1	97.3	1	1	1
1	97.3	2	1	1
1	97.3	3	1	0
1	97.3	5	1	1
1	97.3	7	1	1
1	97.4	1	1	1
1	97.4	2	1	1
1	97.4	4	1	1
1	97.4	6	1	1
1	97.6	1	1	1
1	97.6	2	1	1
2	97.7	1	1	1
2	97.7	2	1	1
2	97.7	3	1	1
1	97.11	3	1	1
1	97.11	4	1	1
1	97.11	5	1	0
1	97.11	7	1	0
1	97.11	8	1	0
1	97.1	1	0	0
1	97.1	2	0	0
1	97.1	3	0	0
1	97.1	4	1	1
1	97.1	7	1	0
1	97.1	8	0	1
1	97.2	1	1	1
1	97.2	2	1
1	97.2	3	1	1
1	97.2	4	1	1
1	97.2	5	0	1
1	97.2	7	1	1
1	97.3	1	1	1
1	97.3	2	1	1
1	97.3	3	1	0
1	97.3	4	0	1
1	97.3	5	1	1
1	97.3	6	0	1
1	97.3	7	1	1
1	97.4	1	1	1
1	97.4	2	1	1
1	97.4	3	0	0
1	97.4	4	1	1
1	97.4	5	0	0
1	97.4	6	1	1
1	97.6	1	1	1
1	97.6	2	1	1
1	97.6	4	0	1
1	97.7	1	1	1
1	97.7	2	1	1
1	97.7	3	1	1
1	97.8	1	0	1
1	97.9	1	0	0
1	97.9	2	0	0
1	97.9	3	0	0
1	97.9	4	0	0
1	97.1	1	0	1
1	97.11	2	0	0
1	97.11	3	1	1
1	97.11	4	1	1
1	97.11	5	1	0
1	97.11	6	0	0
1	97.11	7	1	0
1	97.11	8	1	0
1	97.11	9	0	0
